# Supplementary material for: Genomic Analysis of G2P[4] Group A Rotaviruses in Zambia Reveals Positive Selection in Amino Acid Site 7 of Viral Protein 3
Source: MDPI journal article supplement (doi:10.3390/v15020501), 2023-02-11
Supplement: s1 [file s1]

## Supplementary data S2: Nucleotide similarities analysis amongst gene segments of Zambian G2P[4] strains.

### VP1

|    |                                                  | 1    | 2    | 3     | 4     | 5    | 6    | 7    | 8    | 9    | 10   | 11    | 12   | 13    | 14   | 15    | 16   | 17   | 18   | 19   | 20   | 21    | 22   | 23   | 24   | 25   | 26    | 27   | 28   | 29 |
|----|--------------------------------------------------|------|------|-------|-------|------|------|------|------|------|------|-------|------|-------|------|-------|------|------|------|------|------|-------|------|------|------|------|-------|------|------|----|
| 1  | RVA/Human-wt/ZMB/UFS-NGS-MRC-DPRU1724/2012/G2P4  |      |      |       |       |      |      |      |      |      |      |       |      |       |      |       |      |      |      |      |      |       |      |      |      |      |       |      |      |    |
| 2  | RVA/Human-wt/ZMB/UFS-NGS-MRC-DPRU1729/2012/G2P4  | 99.9 |      |       |       |      |      |      |      |      |      |       |      |       |      |       |      |      |      |      |      |       |      |      |      |      |       |      |      |    |
| 3  | RVA/Human-wt/ZMB/UFS-NGS-MRC-DPRU4691/2014/G2P4  | 99.8 | 99.8 |       |       |      |      |      |      |      |      |       |      |       |      |       |      |      |      |      |      |       |      |      |      |      |       |      |      |    |
| 4  | RVA/Human-wt/ZMB/UFS-NGS-MRC-DPRU4699/2014/G2P4  | 99.9 | 99.8 | 99.7  |       |      |      |      |      |      |      |       |      |       |      |       |      |      |      |      |      |       |      |      |      |      |       |      |      |    |
| 5  | RVA/Human-wt/ZMB/UFS-NGS-MRC-DPRU4705/2014/G2P4  | 99.7 | 99.7 | 100.0 | 99.7  |      |      |      |      |      |      |       |      |       |      |       |      |      |      |      |      |       |      |      |      |      |       |      |      |    |
| 6  | RVA/Human-wt/ZMB/UFS-NGS-MRC-DPRU4714/2014/G2P4  | 99.7 | 99.7 | 100.0 | 99.7  | 99.9 |      |      |      |      |      |       |      |       |      |       |      |      |      |      |      |       |      |      |      |      |       |      |      |    |
| 7  | RVA/Human-wt/ZMB/UFS-NGS-MRC-DPRU4718/2014/G2P4  | 98.9 | 98.9 | 99.1  | 98.9  | 99.1 | 99.1 |      |      |      |      |       |      |       |      |       |      |      |      |      |      |       |      |      |      |      |       |      |      |    |
| 8  | RVA/Human-wt/ZMB/UFS-NGS-MRC-DPRU4736/2014/G2P4  | 99.9 | 99.8 | 99.7  | 100.0 | 99.7 | 99.7 | 98.8 |      |      |      |       |      |       |      |       |      |      |      |      |      |       |      |      |      |      |       |      |      |    |
| 9  | RVA/Human-wt/ZMB/UFS-NGS-MRC-DPRU4770/2014/G2P4  | 99.8 | 99.7 | 99.6  | 99.9  | 99.6 | 99.6 | 98.7 | 99.8 |      |      |       |      |       |      |       |      |      |      |      |      |       |      |      |      |      |       |      |      |    |
| 10 | RVA/Human-wt/ZMB/UFS-NGS-MRC-DPRU4819/2014/G2P4  | 99.7 | 99.7 | 99.9  | 99.6  | 99.9 | 99.9 | 99.0 | 99.6 | 99.5 |      |       |      |       |      |       |      |      |      |      |      |       |      |      |      |      |       |      |      |    |
| 11 | RVA/Human-wt/ZMB/UFS-NGS-MRC-DPRU9393/2015/G2P4  | 99.1 | 99.0 | 98.9  | 99.0  | 98.9 | 98.9 | 98.0 | 99.0 | 98.9 | 98.8 |       |      |       |      |       |      |      |      |      |      |       |      |      |      |      |       |      |      |    |
| 12 | RVA/Human-wt/ZMB/UFS-NGS-MRC-DPRU9420/2015/G2P4  | 99.8 | 99.8 | 99.7  | 99.8  | 99.6 | 99.6 | 98.8 | 99.7 | 99.7 | 99.6 | 98.9  |      |       |      |       |      |      |      |      |      |       |      |      |      |      |       |      |      |    |
| 13 | RVA/Human-wt/ZMB/UFS-NGS-MRC-DPRU9438/2015/G2P4  | 99.1 | 99.0 | 98.9  | 99.0  | 98.9 | 98.9 | 98.0 | 99.0 | 98.9 | 98.8 | 100.0 | 98.9 |       |      |       |      |      |      |      |      |       |      |      |      |      |       |      |      |    |
| 14 | RVA/Human-wt/ZMB/UFS-NGS-MRC-DPRU9464/2015/G2P4  | 99.8 | 99.8 | 99.7  | 99.8  | 99.6 | 99.6 | 98.8 | 99.7 | 99.7 | 99.6 | 98.9  | 99.9 | 98.9  |      |       |      |      |      |      |      |       |      |      |      |      |       |      |      |    |
| 15 | RVA/Human-wt/ZMB/UFS-NGS-MRC-DPRU9475/2015/G2P4  | 99.1 | 99.0 | 98.9  | 99.0  | 98.9 | 98.9 | 98.0 | 99.0 | 98.9 | 98.8 | 100.0 | 98.9 | 100.0 | 98.9 |       |      |      |      |      |      |       |      |      |      |      |       |      |      |    |
| 16 | RVA/Human-wt/ZMB/UFS-NGS-MRC-DPRU9495/2015/G2P4  | 99.1 | 99.0 | 98.9  | 99.0  | 98.9 | 98.9 | 98.0 | 99.0 | 98.9 | 98.8 | 100.0 | 98.9 | 100.0 | 98.9 | 100.0 |      |      |      |      |      |       |      |      |      |      |       |      |      |    |
| 17 | RVA/Human-wt/ZMB/UFS-NGS-MRC-DPRU9502/2015/G2P4  | 99.8 | 99.8 | 99.7  | 99.8  | 99.7 | 99.7 | 98.8 | 99.8 | 99.7 | 99.7 | 98.9  | 99.9 | 99.9  | 98.9 | 98.9  | 98.9 |      |      |      |      |       |      |      |      |      |       |      |      |    |
| 18 | RVA/Human-wt/ZMB/UFS-NGS-MRC-DPRU9503/2015/G2P4  | 99.8 | 99.8 | 99.7  | 99.8  | 99.6 | 99.6 | 98.8 | 99.7 | 99.7 | 99.6 | 98.9  | 99.9 | 98.9  | 99.9 | 98.9  | 98.9 | 99.9 |      |      |      |       |      |      |      |      |       |      |      |    |
| 19 | RVA/Human-wt/ZMB/UFS-NGS-MRC-DPRU9515/2015/G2P4  | 99.8 | 99.8 | 99.6  | 99.7  | 99.6 | 99.6 | 98.8 | 99.7 | 99.7 | 99.6 | 98.9  | 99.9 | 98.9  | 99.9 | 98.9  | 98.9 | 99.9 | 99.8 |      |      |       |      |      |      |      |       |      |      |    |
| 20 | RVA/Human-wt/ZMB/UFS-NGS-MRC-DPRU9556/2015/G2P4  | 99.8 | 99.8 | 99.7  | 99.8  | 99.7 | 99.7 | 98.8 | 99.8 | 99.7 | 99.7 | 98.9  | 99.9 | 98.9  | 99.9 | 98.9  | 98.9 | 99.9 | 99.9 | 99.9 |      |       |      |      |      |      |       |      |      |    |
| 21 | RVA/Human-wt/ZMB/UFS-NGS-MRC-DPRU9559/2015/G2P4  | 99.8 | 99.8 | 99.7  | 99.8  | 99.6 | 99.6 | 98.8 | 99.7 | 99.7 | 99.6 | 98.9  | 99.8 | 98.9  | 99.8 | 98.9  | 99.8 | 99.8 | 99.8 | 99.8 | 99.8 |       |      |      |      |      |       |      |      |    |
| 22 | RVA/Human-wt/ZMB/UFS-NGS-MRC-DPRU13231/2016/G2P4 | 99.8 | 99.8 | 99.6  | 99.7  | 99.6 | 99.6 | 98.8 | 99.7 | 99.7 | 99.6 | 98.9  | 99.8 | 98.9  | 99.8 | 98.9  | 99.8 | 99.8 | 99.8 | 99.8 | 99.9 | 99.8  |      |      |      |      |       |      |      |    |
| 23 | RVA/Human-wt/ZMB/UFS-NGS-MRC-DPRU13301/2016/G2P4 | 97.5 | 97.5 | 97.5  | 97.6  | 97.4 | 97.4 | 96.6 | 97.6 | 97.5 | 97.4 | 97.5  | 97.4 | 97.5  | 97.4 | 97.5  | 97.5 | 97.5 | 97.4 | 97.4 | 97.5 | 97.4  | 97.4 |      |      |      |       |      |      |    |
| 24 | RVA/Human-wt/ZMB/UFS-NGS-MRC-DPRU13352/2016/G2P4 | 99.8 | 99.8 | 99.6  | 99.7  | 99.6 | 99.6 | 98.8 | 99.7 | 99.7 | 99.6 | 98.9  | 99.8 | 98.9  | 99.8 | 98.9  | 99.8 | 98.9 | 99.9 | 99.8 | 99.8 | 99.9  | 99.8 | 99.8 | 97.4 |      |       |      |      |    |
| 25 | RVA/Human-wt/ZMB/UFS-NGS-MRC-DPRU13545/2016/G2P4 | 99.8 | 99.8 | 99.7  | 99.8  | 99.6 | 99.6 | 98.8 | 99.7 | 99.7 | 99.6 | 98.9  | 99.9 | 98.9  | 99.9 | 98.9  | 99.9 | 99.9 | 99.8 | 99.8 | 99.8 | 100.0 | 97.4 | 99.8 |      |      |       |      |      |    |
| 26 | RVA/Human-wt/ZMB/UFS-NGS-MRC-DPRU16599/2016/G2P4 | 99.7 | 99.7 | 99.6  | 99.7  | 99.6 | 99.6 | 98.8 | 99.6 | 99.6 | 99.6 | 98.8  | 99.8 | 98.8  | 99.8 | 98.8  | 99.8 | 99.8 | 99.8 | 99.8 | 99.8 | 99.7  | 99.8 | 97.5 | 99.8 | 99.8 |       |      |      |    |
| 27 | RVA/Human-wt/ZMB/UFS-NGS-MRC-DPRU16601/2016/G2P4 | 99.7 | 99.7 | 99.6  | 99.7  | 99.6 | 99.6 | 98.8 | 99.6 | 99.6 | 99.6 | 98.8  | 99.8 | 98.8  | 99.8 | 98.8  | 99.8 | 99.8 | 99.8 | 99.8 | 99.8 | 99.7  | 99.8 | 97.5 | 99.8 | 99.8 | 100.0 |      |      |    |
| 28 | RVA/Human-wt/ZMB/UFS-NGS-MRC-DPRU16639/2016/G2P4 | 99.6 | 99.6 | 99.5  | 99.6  | 99.4 | 99.4 | 98.6 | 99.5 | 99.5 | 99.4 | 98.7  | 99.7 | 98.7  | 99.7 | 98.7  | 99.7 | 99.7 | 99.7 | 99.7 | 99.7 | 99.6  | 99.7 | 97.3 | 99.7 | 99.7 | 99.8  | 99.8 |      |    |
| 29 | RVA/Human-wt/ZMB/UFS-NGS-MRC-DPRU16646/2016/G2P4 | 99.8 | 99.8 | 99.7  | 99.8  | 99.7 | 99.7 | 98.8 | 99.8 | 99.7 | 99.7 | 99.0  | 99.9 | 99.0  | 99.9 | 99.0  | 99.0 | 99.9 | 99.9 | 99.9 | 99.9 | 99.8  | 99.9 | 97.5 | 99.9 | 99.9 | 99.8  | 99.8 | 99.7 |    |

### VP2

|    |                                                  | 1     | 2     | 3     | 4     | 5     | 6     | 7     | 8     | 9    | 10   | 11    | 12   | 13    | 14    | 15    | 16    | 17   | 18    | 19    | 20   | 21   | 22   | 23   | 24   | 25    | 26   | 27    | 28    | 29   |
|----|--------------------------------------------------|-------|-------|-------|-------|-------|-------|-------|-------|------|------|-------|------|-------|-------|-------|-------|------|-------|-------|------|------|------|------|------|-------|------|-------|-------|------|
| 1  | RVA/Human-wt/ZMB/UFS-NGS-MRC-DPRU1724/2012/G2P4  |       |       |       |       |       |       |       |       |      |      |       |      |       |       |       |       |      |       |       |      |      |      |      |      |       |      |       |       |      |
| 2  | RVA/Human-wt/ZMB/UFS-NGS-MRC-DPRU4718/2014/G2P4  | 99.8  |       |       |       |       |       |       |       |      |      |       |      |       |       |       |       |      |       |       |      |      |      |      |      |       |      |       |       |      |
| 3  | RVA/Human-wt/ZMB/UFS-NGS-MRC-DPRU1729/2012/G2P4  | 100.0 | 99.9  |       |       |       |       |       |       |      |      |       |      |       |       |       |       |      |       |       |      |      |      |      |      |       |      |       |       |      |
| 4  | RVA/Human-wt/ZMB/UFS-NGS-MRC-DPRU4691/2014/G2P4  | 99.8  | 100.0 | 99.9  |       |       |       |       |       |      |      |       |      |       |       |       |       |      |       |       |      |      |      |      |      |       |      |       |       |      |
| 5  | RVA/Human-wt/ZMB/UFS-NGS-MRC-DPRU4699/2014/G2P4  | 100.0 | 99.9  | 100.0 | 99.9  |       |       |       |       |      |      |       |      |       |       |       |       |      |       |       |      |      |      |      |      |       |      |       |       |      |
| 6  | RVA/Human-wt/ZMB/UFS-NGS-MRC-DPRU4705/2014/G2P4  | 99.8  | 100.0 | 99.9  | 100.0 | 99.9  |       |       |       |      |      |       |      |       |       |       |       |      |       |       |      |      |      |      |      |       |      |       |       |      |
| 7  | RVA/Human-wt/ZMB/UFS-NGS-MRC-DPRU4714/2014/G2P4  | 99.8  | 100.0 | 99.9  | 100.0 | 99.9  | 100.0 |       |       |      |      |       |      |       |       |       |       |      |       |       |      |      |      |      |      |       |      |       |       |      |
| 8  | RVA/Human-wt/ZMB/UFS-NGS-MRC-DPRU4736/2014/G2P4  | 100.0 | 99.9  | 100.0 | 99.9  | 100.0 | 99.9  | 99.9  |       |      |      |       |      |       |       |       |       |      |       |       |      |      |      |      |      |       |      |       |       |      |
| 9  | RVA/Human-wt/ZMB/UFS-NGS-MRC-DPRU4770/2014/G2P4  | 99.9  | 99.8  | 100.0 | 99.8  | 100.0 | 99.8  | 99.8  | 100.0 |      |      |       |      |       |       |       |       |      |       |       |      |      |      |      |      |       |      |       |       |      |
| 10 | RVA/Human-wt/ZMB/UFS-NGS-MRC-DPRU4819/2014/G2P4  | 99.8  | 100.0 | 99.9  | 100.0 | 99.9  | 100.0 | 100.0 | 99.9  | 99.8 |      |       |      |       |       |       |       |      |       |       |      |      |      |      |      |       |      |       |       |      |
| 11 | RVA/Human-wt/ZMB/UFS-NGS-MRC-DPRU9393/2015/G2P4  | 99.8  | 99.7  | 99.8  | 99.7  | 99.8  | 99.7  | 99.7  | 99.8  | 99.8 | 99.7 |       |      |       |       |       |       |      |       |       |      |      |      |      |      |       |      |       |       |      |
| 12 | RVA/Human-wt/ZMB/UFS-NGS-MRC-DPRU9420/2015/G2P4  | 99.7  | 99.6  | 99.7  | 99.6  | 99.7  | 99.6  | 99.6  | 99.7  | 99.7 | 99.6 | 99.9  |      |       |       |       |       |      |       |       |      |      |      |      |      |       |      |       |       |      |
| 13 | RVA/Human-wt/ZMB/UFS-NGS-MRC-DPRU9438/2015/G2P4  | 99.7  | 99.7  | 99.8  | 99.7  | 99.8  | 99.7  | 99.7  | 99.8  | 99.7 | 99.7 | 100.0 | 99.9 |       |       |       |       |      |       |       |      |      |      |      |      |       |      |       |       |      |
| 14 | RVA/Human-wt/ZMB/UFS-NGS-MRC-DPRU9464/2015/G2P4  | 99.8  | 99.7  | 99.8  | 99.7  | 99.8  | 99.7  | 99.7  | 99.8  | 99.8 | 99.7 | 99.9  | 99.8 | 99.9  |       |       |       |      |       |       |      |      |      |      |      |       |      |       |       |      |
| 15 | RVA/Human-wt/ZMB/UFS-NGS-MRC-DPRU9475/2015/G2P4  | 99.7  | 99.7  | 99.8  | 99.7  | 99.8  | 99.7  | 99.7  | 99.8  | 99.7 | 99.7 | 100.0 | 99.9 | 99.9  | 99.9  |       |       |      |       |       |      |      |      |      |      |       |      |       |       |      |
| 16 | RVA/Human-wt/ZMB/UFS-NGS-MRC-DPRU9495/2015/G2P4  | 99.8  | 99.7  | 99.8  | 99.7  | 99.8  | 99.7  | 99.7  | 99.8  | 99.8 | 99.7 | 100.0 | 99.9 | 100.0 | 99.9  | 100.0 |       |      |       |       |      |      |      |      |      |       |      |       |       |      |
| 17 | RVA/Human-wt/ZMB/UFS-NGS-MRC-DPRU9502/2015/G2P4  | 99.7  | 99.7  | 99.8  | 99.7  | 99.8  | 99.7  | 99.7  | 99.8  | 99.7 | 99.7 | 99.9  | 99.9 | 99.8  | 99.9  | 99.8  | 99.9  | 99.8 | 99.9  | 100.0 |      |      |      |      |      |       |      |       |       |      |
| 18 | RVA/Human-wt/ZMB/UFS-NGS-MRC-DPRU9503/2015/G2P4  | 99.8  | 99.7  | 99.8  | 99.7  | 99.8  | 99.7  | 99.7  | 99.8  | 99.8 | 99.7 | 99.9  | 99.8 | 99.9  | 99.9  | 99.9  | 99.9  | 99.8 | 99.8  | 99.8  | 99.8 |      |      |      |      |       |      |       |       |      |
| 19 | RVA/Human-wt/ZMB/UFS-NGS-MRC-DPRU9515/2015/G2P4  | 99.7  | 99.6  | 99.7  | 99.6  | 99.7  | 99.6  | 99.6  | 99.7  | 99.7 | 99.6 | 99.8  | 99.8 | 99.8  | 99.8  | 99.8  | 99.8  | 99.8 | 99.8  | 99.8  | 99.8 | 99.8 |      |      |      |       |      |       |       |      |
| 20 | RVA/Human-wt/ZMB/UFS-NGS-MRC-DPRU9556/2015/G2P4  | 99.7  | 99.6  | 99.7  | 99.6  | 99.7  | 99.6  | 99.6  | 99.7  | 99.7 | 99.6 | 99.8  | 99.8 | 99.8  | 99.8  | 99.8  | 99.8  | 99.8 | 99.9  | 99.9  | 99.8 |      |      |      |      |       |      |       |       |      |
| 21 | RVA/Human-wt/ZMB/UFS-NGS-MRC-DPRU9559/2015/G2P4  | 99.8  | 99.7  | 99.8  | 99.7  | 99.8  | 99.7  | 99.7  | 99.8  | 99.8 | 99.7 | 100.0 | 99.9 | 99.9  | 100.0 | 99.9  | 100.0 | 99.9 | 100.0 | 99.9  | 99.9 | 99.9 | 99.9 |      |      |       |      |       |       |      |
| 22 | RVA/Human-wt/ZMB/UFS-NGS-MRC-DPRU13231/2016/G2P4 | 99.7  | 99.6  | 99.7  | 99.6  | 99.7  | 99.6  | 99.6  | 99.7  | 99.7 | 99.6 | 99.8  | 99.8 | 99.8  | 99.8  | 99.8  | 99.8  | 99.9 | 99.9  | 99.8  | 99.8 | 99.9 | 99.9 |      |      |       |      |       |       |      |
| 23 | RVA/Human-wt/ZMB/UFS-NGS-MRC-DPRU13301/2016/G2P4 | 99.7  | 99.6  | 99.7  | 99.6  | 99.7  | 99.6  | 99.6  | 99.7  | 99.7 | 99.6 | 99.8  | 99.8 | 99.8  | 99.8  | 99.8  | 99.8  | 99.9 | 99.9  | 99.8  | 99.8 | 99.9 | 99.9 | 99.9 |      |       |      |       |       |      |
| 24 | RVA/Human-wt/ZMB/UFS-NGS-MRC-DPRU13352/2016/G2P4 | 99.6  | 99.5  | 99.7  | 99.5  | 99.7  | 99.5  | 99.5  | 99.5  | 99.6 | 99.5 | 99.8  | 99.7 | 99.7  | 99.8  | 99.7  | 99.8  | 99.9 | 99.8  | 99.7  | 99.8 | 99.8 | 99.8 | 99.8 |      |       |      |       |       |      |
| 25 | RVA/Human-wt/ZMB/UFS-NGS-MRC-DPRU13545/2016/G2P4 | 99.7  | 99.6  | 99.7  | 99.6  | 99.7  | 99.6  | 99.6  | 99.7  | 99.7 | 99.6 | 99.8  | 99.8 | 99.8  | 99.8  | 99.8  | 99.8  | 99.9 | 99.8  | 99.7  | 99.8 | 99.8 | 99.9 | 99.9 | 99.9 | 99.9  | 99.8 |       |       |      |
| 26 | RVA/Human-wt/ZMB/UFS-NGS-MRC-DPRU16599/2016/G2P4 | 99.6  | 99.5  | 99.7  | 99.5  | 99.7  | 99.5  | 99.5  | 99.5  | 99.6 | 99.5 | 99.7  | 99.7 | 99.7  | 99.7  | 99.7  | 99.7  | 99.7 | 99.7  | 99.7  | 99.7 | 99.7 | 99.7 | 99.7 | 99.7 | 99.7  | 99.7 | 99.6  | 99.7  |      |
| 27 | RVA/Human-wt/ZMB/UFS-NGS-MRC-DPRU16601/2016/G2P4 | 99.6  | 99.5  | 99.7  | 99.5  | 99.7  | 99.5  | 99.5  | 99.5  | 99.6 | 99.5 | 99.7  | 99.7 | 99.7  | 99.7  | 99.7  | 99.7  | 99.7 | 99.7  | 99.7  | 99.7 | 99.7 | 99.7 | 99.7 | 99.7 | 99.7  | 99.6 | 99.7  | 100.0 |      |
| 28 | RVA/Human-wt/ZMB/UFS-NGS-MRC-DPRU16639/2016/G2P4 | 99.6  | 99.5  | 99.6  | 99.5  | 99.6  | 99.5  | 99.5  | 99.5  | 99.6 | 99.5 | 99.7  | 99.6 | 99.7  | 99.7  | 99.7  | 99.7  | 99.7 | 99.7  | 99.7  | 99.6 | 99.6 | 99.7 | 99.6 | 99.6 | 99.5  | 99.6 | 100.0 | 100.0 |      |
| 29 | RVA/Human-wt/ZMB/UFS-NGS-MRC-DPRU16646/2016/G2P4 | 99.6  | 99.5  | 99.7  | 99.5  | 99.7  | 99.5  | 99.5  | 99.5  | 99.6 | 99.5 | 99.8  | 99.7 | 99.7  | 99.8  | 99.7  | 99.8  | 99.7 | 99.8  | 99.8  | 99.7 | 99.6 | 99.8 | 99.8 | 99.8 | 100.0 | 99.8 | 99.6  | 99.6  | 99.5 |

### VP3

|    |                                                  | 1     | 2     | 3     | 4    | 5    | 6    | 7    | 8    | 9     | 10    | 11    | 12   | 13   | 14    | 15    | 16    | 17   | 18   | 19    | 20   | 21   | 22    | 23    | 24    | 25   | 26    | 27    | 28   |  |
|----|--------------------------------------------------|-------|-------|-------|------|------|------|------|------|-------|-------|-------|------|------|-------|-------|-------|------|------|-------|------|------|-------|-------|-------|------|-------|-------|------|--|
| 1  | RVA/Human-wt/ZMB/UFS-NGS-MRC-DPRU1724/2012/G2P4  |       |       |       |      |      |      |      |      |       |       |       |      |      |       |       |       |      |      |       |      |      |       |       |       |      |       |       |      |  |
| 2  | RVA/Human-wt/ZMB/UFS-NGS-MRC-DPRU4699/2014/G2P4  | 99.8  |       |       |      |      |      |      |      |       |       |       |      |      |       |       |       |      |      |       |      |      |       |       |       |      |       |       |      |  |
| 3  | RVA/Human-wt/ZMB/UFS-NGS-MRC-DPRU4705/2014/G2P4  | 99.8  | 99.6  |       |      |      |      |      |      |       |       |       |      |      |       |       |       |      |      |       |      |      |       |       |       |      |       |       |      |  |
| 4  | RVA/Human-wt/ZMB/UFS-NGS-MRC-DPRU4714/2014/G2P4  | 99.6  | 99.5  | 99.8  |      |      |      |      |      |       |       |       |      |      |       |       |       |      |      |       |      |      |       |       |       |      |       |       |      |  |
| 5  | RVA/Human-wt/ZMB/UFS-NGS-MRC-DPRU4718/2014/G2P4  | 99.0  | 98.9  | 99.3  | 99.1 |      |      |      |      |       |       |       |      |      |       |       |       |      |      |       |      |      |       |       |       |      |       |       |      |  |
| 6  | RVA/Human-wt/ZMB/UFS-NGS-MRC-DPRU4736/2014/G2P4  | 99.8  | 100.0 | 99.6  | 99.4 | 98.9 |      |      |      |       |       |       |      |      |       |       |       |      |      |       |      |      |       |       |       |      |       |       |      |  |
| 7  | RVA/Human-wt/ZMB/UFS-NGS-MRC-DPRU4770/2014/G2P4  | 99.7  | 99.8  | 99.5  | 99.4 | 98.8 | 99.8 |      |      |       |       |       |      |      |       |       |       |      |      |       |      |      |       |       |       |      |       |       |      |  |
| 8  | RVA/Human-wt/ZMB/UFS-NGS-MRC-DPRU4819/2014/G2P4  | 99.7  | 99.6  | 100.0 | 99.8 | 99.2 | 99.6 | 99.5 |      |       |       |       |      |      |       |       |       |      |      |       |      |      |       |       |       |      |       |       |      |  |
| 9  | RVA/Human-wt/ZMB/UFS-NGS-MRC-DPRU9393/2015/G2P4  | 99.7  | 99.6  | 99.5  | 99.4 | 98.9 | 99.5 | 99.4 | 99.5 |       |       |       |      |      |       |       |       |      |      |       |      |      |       |       |       |      |       |       |      |  |
| 10 | RVA/Human-wt/ZMB/UFS-NGS-MRC-DPRU9420/2015/G2P4  | 99.7  | 99.6  | 99.6  | 99.4 | 98.9 | 99.6 | 99.5 | 99.5 | 99.9  |       |       |      |      |       |       |       |      |      |       |      |      |       |       |       |      |       |       |      |  |
| 11 | RVA/Human-wt/ZMB/UFS-NGS-MRC-DPRU9438/2015/G2P4  | 99.7  | 99.6  | 99.6  | 99.4 | 98.9 | 99.6 | 99.5 | 99.5 | 100.0 | 99.9  |       |      |      |       |       |       |      |      |       |      |      |       |       |       |      |       |       |      |  |
| 12 | RVA/Human-wt/ZMB/UFS-NGS-MRC-DPRU9464/2015/G2P4  | 99.7  | 99.5  | 99.4  | 99.4 | 98.8 | 99.4 | 99.4 | 99.4 | 99.8  | 99.8  | 99.8  |      |      |       |       |       |      |      |       |      |      |       |       |       |      |       |       |      |  |
| 13 | RVA/Human-wt/ZMB/UFS-NGS-MRC-DPRU9475/2015/G2P4  | 99.7  | 99.5  | 99.4  | 99.3 | 98.8 | 99.4 | 99.4 | 99.4 | 99.8  | 99.8  | 99.9  | 99.8 |      |       |       |       |      |      |       |      |      |       |       |       |      |       |       |      |  |
| 14 | RVA/Human-wt/ZMB/UFS-NGS-MRC-DPRU9495/2015/G2P4  | 99.8  | 99.6  | 99.6  | 99.4 | 98.9 | 99.6 | 99.5 | 99.5 | 99.9  | 99.9  | 99.9  | 99.9 | 99.9 |       |       |       |      |      |       |      |      |       |       |       |      |       |       |      |  |
| 15 | RVA/Human-wt/ZMB/UFS-NGS-MRC-DPRU9502/2015/G2P4  | 99.8  | 99.6  | 99.6  | 99.4 | 99.0 | 99.6 | 99.5 | 99.6 | 99.9  | 100.0 | 100.0 | 99.8 | 99.8 | 100.0 |       |       |      |      |       |      |      |       |       |       |      |       |       |      |  |
| 16 | RVA/Human-wt/ZMB/UFS-NGS-MRC-DPRU9503/2015/G2P4  | 99.8  | 99.6  | 99.6  | 99.4 | 99.0 | 99.6 | 99.5 | 99.6 | 99.9  | 100.0 | 100.0 | 99.8 | 99.8 | 100.0 | 100.0 |       |      |      |       |      |      |       |       |       |      |       |       |      |  |
| 17 | RVA/Human-wt/ZMB/UFS-NGS-MRC-DPRU1729/2012/G2P4  | 100.0 | 99.8  | 99.7  | 99.6 | 99.0 | 99.7 | 99.6 | 99.7 | 99.7  | 99.8  | 99.8  | 99.7 | 99.7 | 99.8  | 99.8  | 99.8  |      |      |       |      |      |       |       |       |      |       |       |      |  |
| 18 | RVA/Human-wt/ZMB/UFS-NGS-MRC-DPRU4691/2014/G2P4  | 99.8  | 99.6  | 99.9  | 99.8 | 99.2 | 99.5 | 99.4 | 99.9 | 99.4  | 99.5  | 99.5  | 99.4 | 99.4 | 99.6  | 99.5  | 99.5  | 99.7 |      |       |      |      |       |       |       |      |       |       |      |  |
| 19 | RVA/Human-wt/ZMB/UFS-NGS-MRC-DPRU9515/2015/G2P4  | 99.8  | 99.6  | 99.6  | 99.4 | 98.9 | 99.6 | 99.5 | 99.5 | 99.9  | 99.9  | 99.9  | 99.9 | 99.9 | 100.0 | 100.0 | 100.0 | 99.8 | 99.6 |       |      |      |       |       |       |      |       |       |      |  |
| 20 | RVA/Human-wt/ZMB/UFS-NGS-MRC-DPRU9556/2015/G2P4  | 99.8  | 99.6  | 99.6  | 99.4 | 99.0 | 99.6 | 99.5 | 99.6 | 99.9  | 100.0 | 100.0 | 99.8 | 99.8 | 100.0 | 100.0 | 100.0 | 99.8 | 99.5 | 100.0 |      |      |       |       |       |      |       |       |      |  |
| 21 | RVA/Human-wt/ZMB/UFS-NGS-MRC-DPRU9559/2015/G2P4  | 99.7  | 99.5  | 99.5  | 99.3 | 98.8 | 99.5 | 99.4 | 99.4 | 99.8  | 99.8  | 99.8  | 99.8 | 99.8 | 99.9  | 99.9  | 99.9  | 99.8 | 99.5 | 99.9  | 99.9 |      |       |       |       |      |       |       |      |  |
| 22 | RVA/Human-wt/ZMB/UFS-NGS-MRC-DPRU13231/2016/G2P4 | 99.7  | 99.5  | 99.5  | 99.3 | 98.8 | 99.5 | 99.4 | 99.4 | 99.8  | 99.8  | 99.8  | 99.8 | 99.8 | 99.9  | 99.9  | 99.9  | 99.8 | 99.5 | 99.9  | 99.9 | 99.8 |       |       |       |      |       |       |      |  |
| 23 | RVA/Human-wt/ZMB/UFS-NGS-MRC-DPRU13301/2016/G2P4 | 99.7  | 99.5  | 99.4  | 99.3 | 98.8 | 99.4 | 99.4 | 99.4 | 99.8  | 99.8  | 99.8  | 99.8 | 99.8 | 99.9  | 99.8  | 99.8  | 99.7 | 99.4 | 99.9  | 99.8 | 99.8 | 100.0 |       |       |      |       |       |      |  |
| 24 | RVA/Human-wt/ZMB/UFS-NGS-MRC-DPRU13352/2016/G2P4 | 99.6  | 99.5  | 99.4  | 99.3 | 98.8 | 99.4 | 99.4 | 99.4 | 99.8  | 99.8  | 99.8  | 99.7 | 99.7 | 99.8  | 99.8  | 99.8  | 99.6 | 99.4 | 99.8  | 99.8 | 99.7 | 99.7  | 99.7  |       |      |       |       |      |  |
| 25 | RVA/Human-wt/ZMB/UFS-NGS-MRC-DPRU13545/2016/G2P4 | 99.6  | 99.5  | 99.5  | 99.3 | 98.8 | 99.5 | 99.4 | 99.4 | 99.8  | 99.8  | 99.8  | 99.7 | 99.7 | 99.8  | 99.9  | 99.9  | 99.7 | 99.4 | 99.8  | 99.9 | 99.8 | 99.9  | 100.0 | 99.7  |      |       |       |      |  |
| 26 | RVA/Human-wt/ZMB/UFS-NGS-MRC-DPRU16599/2016/G2P4 | 99.7  | 99.6  | 99.5  | 99.4 | 98.9 | 99.5 | 99.4 | 99.5 | 99.8  | 99.8  | 99.9  | 99.8 | 99.8 | 99.9  | 99.9  | 99.9  | 99.7 | 99.4 | 99.9  | 99.9 | 99.8 | 99.8  | 99.8  | 99.8  | 99.8 |       |       |      |  |
| 27 | RVA/Human-wt/ZMB/UFS-NGS-MRC-DPRU16601/2016/G2P4 | 99.7  | 99.5  | 99.5  | 99.3 | 98.8 | 99.5 | 99.4 | 99.4 | 99.8  | 99.8  | 99.8  | 99.8 | 99.8 | 99.9  | 99.9  | 99.9  | 99.8 | 99.5 | 99.9  | 99.9 | 99.8 | 99.8  | 99.8  | 99.7  | 99.8 | 100.0 |       |      |  |
| 28 | RVA/Human-wt/ZMB/UFS-NGS-MRC-DPRU16639/2016/G2P4 | 99.7  | 99.6  | 99.5  | 99.4 | 98.9 | 99.5 | 99.4 | 99.5 | 99.8  | 99.9  | 99.9  | 99.8 | 99.8 | 99.9  | 99.9  | 99.9  | 99.7 | 99.4 | 99.9  | 99.9 | 99.8 | 99.8  | 99.8  | 99.8  | 99.8 | 100.0 | 100.0 |      |  |
| 29 | RVA/Human-wt/ZMB/UFS-NGS-MRC-DPRU16646/2016/G2P4 | 99.6  | 99.5  | 99.5  | 99.3 | 98.8 | 99.5 | 99.4 | 99.4 | 99.8  | 99.8  | 99.8  | 99.7 | 99.7 | 99.8  | 99.9  | 99.9  | 99.7 | 99.4 | 99.8  | 99.9 | 99.8 | 99.8  | 99.7  | 100.0 | 99.8 | 99.8  | 99.8  | 99.8 |  |

### VP4

|    |                                                  | 1     | 2     | 3    | 4     | 5     | 6     | 7    | 8     | 9    | 10   | 11    | 12   | 13    | 14   | 15    | 16    | 17   | 18   | 19   | 20   | 21   | 22   | 23    | 24    | 25   | 26    | 27   | 28 |
|----|--------------------------------------------------|-------|-------|------|-------|-------|-------|------|-------|------|------|-------|------|-------|------|-------|-------|------|------|------|------|------|------|-------|-------|------|-------|------|----|
| 1  | RVA/Human-wt/ZMB/UFS-NGS-MRC-DPRU1724/2012/G2P4  |       |       |      |       |       |       |      |       |      |      |       |      |       |      |       |       |      |      |      |      |      |      |       |       |      |       |      |    |
| 2  | RVA/Human-wt/ZMB/UFS-NGS-MRC-DPRU1729/2012/G2P4  | 100.0 |       |      |       |       |       |      |       |      |      |       |      |       |      |       |       |      |      |      |      |      |      |       |       |      |       |      |    |
| 3  | RVA/Human-wt/ZMB/UFS-NGS-MRC-DPRU4691/2014/G2P4  | 99.8  | 99.8  |      |       |       |       |      |       |      |      |       |      |       |      |       |       |      |      |      |      |      |      |       |       |      |       |      |    |
| 4  | RVA/Human-wt/ZMB/UFS-NGS-MRC-DPRU4699/2014/G2P4  | 99.9  | 99.9  | 99.7 |       |       |       |      |       |      |      |       |      |       |      |       |       |      |      |      |      |      |      |       |       |      |       |      |    |
| 5  | RVA/Human-wt/ZMB/UFS-NGS-MRC-DPRU4714/2014/G2P4  | 99.8  | 99.8  | 99.9 | 99.7  |       |       |      |       |      |      |       |      |       |      |       |       |      |      |      |      |      |      |       |       |      |       |      |    |
| 6  | RVA/Human-wt/ZMB/UFS-NGS-MRC-DPRU4718/2014/G2P4  | 99.8  | 99.8  | 99.9 | 99.7  | 99.9  |       |      |       |      |      |       |      |       |      |       |       |      |      |      |      |      |      |       |       |      |       |      |    |
| 7  | RVA/Human-wt/ZMB/UFS-NGS-MRC-DPRU4736/2014/G2P4  | 99.9  | 99.9  | 99.7 | 100.0 | 99.7  | 99.7  |      |       |      |      |       |      |       |      |       |       |      |      |      |      |      |      |       |       |      |       |      |    |
| 8  | RVA/Human-wt/ZMB/UFS-NGS-MRC-DPRU4705/2014/G2P4  | 99.9  | 99.9  | 99.9 | 99.8  | 100.0 | 100.0 | 99.7 |       |      |      |       |      |       |      |       |       |      |      |      |      |      |      |       |       |      |       |      |    |
| 9  | RVA/Human-wt/ZMB/UFS-NGS-MRC-DPRU4770/2014/G2P4  | 99.7  | 99.7  | 99.5 | 99.8  | 99.6  | 99.6  | 99.8 | 99.6  |      |      |       |      |       |      |       |       |      |      |      |      |      |      |       |       |      |       |      |    |
| 10 | RVA/Human-wt/ZMB/UFS-NGS-MRC-DPRU4819/2014/G2P4  | 99.8  | 99.8  | 99.9 | 99.7  | 99.9  | 99.9  | 99.7 | 100.0 | 99.6 |      |       |      |       |      |       |       |      |      |      |      |      |      |       |       |      |       |      |    |
| 11 | RVA/Human-wt/ZMB/UFS-NGS-MRC-DPRU9393/2015/G2P4  | 99.9  | 99.9  | 99.7 | 99.8  | 99.7  | 99.7  | 99.7 | 99.7  | 99.6 | 99.7 |       |      |       |      |       |       |      |      |      |      |      |      |       |       |      |       |      |    |
| 12 | RVA/Human-wt/ZMB/UFS-NGS-MRC-DPRU9420/2015/G2P4  | 99.9  | 99.9  | 99.7 | 99.8  | 99.7  | 99.7  | 99.7 | 99.7  | 99.6 | 99.7 | 99.8  |      |       |      |       |       |      |      |      |      |      |      |       |       |      |       |      |    |
| 13 | RVA/Human-wt/ZMB/UFS-NGS-MRC-DPRU9438/2015/G2P4  | 99.8  | 99.8  | 99.6 | 99.7  | 99.7  | 99.7  | 99.7 | 99.7  | 99.6 | 99.7 | 100.0 | 99.8 |       |      |       |       |      |      |      |      |      |      |       |       |      |       |      |    |
| 14 | RVA/Human-wt/ZMB/UFS-NGS-MRC-DPRU9464/2015/G2P4  | 99.9  | 99.9  | 99.7 | 99.8  | 99.7  | 99.7  | 99.7 | 99.7  | 99.6 | 99.7 | 99.8  | 99.8 | 99.8  |      |       |       |      |      |      |      |      |      |       |       |      |       |      |    |
| 15 | RVA/Human-wt/ZMB/UFS-NGS-MRC-DPRU9475/2015/G2P4  | 99.8  | 99.8  | 99.6 | 99.7  | 99.7  | 99.7  | 99.7 | 99.7  | 99.6 | 99.7 | 100.0 | 99.8 | 99.9  | 99.8 |       |       |      |      |      |      |      |      |       |       |      |       |      |    |
| 16 | RVA/Human-wt/ZMB/UFS-NGS-MRC-DPRU9502/2015/G2P4  | 99.9  | 99.9  | 99.7 | 99.8  | 99.7  | 99.7  | 99.8 | 99.8  | 99.7 | 99.7 | 99.9  | 99.9 | 99.8  | 99.9 | 99.8  |       |      |      |      |      |      |      |       |       |      |       |      |    |
| 17 | RVA/Human-wt/ZMB/UFS-NGS-MRC-DPRU9503/2015/G2P4  | 99.9  | 99.9  | 99.7 | 99.8  | 99.7  | 99.7  | 99.7 | 99.7  | 99.6 | 99.7 | 99.8  | 99.8 | 99.8  | 99.8 | 99.8  | 99.9  |      |      |      |      |      |      |       |       |      |       |      |    |
| 18 | RVA/Human-wt/ZMB/UFS-NGS-MRC-DPRU9495/2015/G2P4  | 99.9  | 99.9  | 99.7 | 99.8  | 99.7  | 99.7  | 99.7 | 99.7  | 99.6 | 99.7 | 100.0 | 99.8 | 100.0 | 99.8 | 100.0 | 99.9  | 99.8 |      |      |      |      |      |       |       |      |       |      |    |
| 19 | RVA/Human-wt/ZMB/UFS-NGS-MRC-DPRU9515/2015/G2P4  | 100.0 | 100.0 | 99.7 | 99.9  | 99.8  | 99.8  | 99.8 | 99.8  | 99.7 | 99.8 | 99.9  | 99.9 | 99.9  | 99.9 | 99.9  | 100.0 | 99.9 | 99.9 |      |      |      |      |       |       |      |       |      |    |
| 20 | RVA/Human-wt/ZMB/UFS-NGS-MRC-DPRU9556/2015/G2P4  | 100.0 | 100.0 | 99.7 | 99.9  | 99.8  | 99.8  | 99.8 | 99.8  | 99.7 | 99.8 | 99.9  | 99.9 | 99.9  | 99.9 | 99.9  | 100.0 | 99.9 | 99.9 |      |      |      |      |       |       |      |       |      |    |
| 21 | RVA/Human-wt/ZMB/UFS-NGS-MRC-DPRU9559/2015/G2P4  | 99.9  | 99.9  | 99.7 | 99.8  | 99.7  | 99.7  | 99.7 | 99.7  | 99.6 | 99.7 | 99.8  | 99.8 | 99.8  | 99.8 | 99.8  | 99.9  | 99.8 | 99.8 | 99.9 | 99.9 |      |      |       |       |      |       |      |    |
| 22 | RVA/Human-wt/ZMB/UFS-NGS-MRC-DPRU13231/2016/G2P4 | 99.7  | 99.7  | 99.4 | 99.6  | 99.5  | 99.5  | 99.6 | 99.5  | 99.4 | 99.5 | 99.6  | 99.6 | 99.6  | 99.6 | 99.6  | 99.7  | 99.6 | 99.6 | 99.7 | 99.7 | 99.7 | 99.6 |       |       |      |       |      |    |
| 23 | RVA/Human-wt/ZMB/UFS-NGS-MRC-DPRU13301/2016/G2P4 | 99.7  | 99.7  | 99.5 | 99.6  | 99.5  | 99.5  | 99.7 | 99.6  | 99.4 | 99.5 | 99.7  | 99.7 | 99.6  | 99.7 | 99.6  | 99.7  | 99.7 | 99.7 | 99.7 | 99.7 | 99.7 | 99.7 | 99.9  |       |      |       |      |    |
| 24 | RVA/Human-wt/ZMB/UFS-NGS-MRC-DPRU13352/2016/G2P4 | 99.8  | 99.8  | 99.6 | 99.7  | 99.7  | 99.7  | 99.7 | 99.7  | 99.6 | 99.7 | 99.8  | 99.8 | 99.7  | 99.8 | 99.7  | 99.8  | 99.8 | 99.8 | 99.8 | 99.9 | 99.9 | 99.8 | 99.6  | 99.6  |      |       |      |    |
| 25 | RVA/Human-wt/ZMB/UFS-NGS-MRC-DPRU13545/2016/G2P4 | 99.7  | 99.7  | 99.4 | 99.6  | 99.5  | 99.5  | 99.6 | 99.5  | 99.4 | 99.5 | 99.6  | 99.6 | 99.6  | 99.6 | 99.6  | 99.6  | 99.7 | 99.6 | 99.6 | 99.7 | 99.7 | 99.6 | 99.8  | 100.0 | 99.6 |       |      |    |
| 26 | RVA/Human-wt/ZMB/UFS-NGS-MRC-DPRU16599/2016/G2P4 | 99.7  | 99.7  | 99.5 | 99.7  | 99.6  | 99.6  | 99.6 | 99.6  | 99.5 | 99.6 | 99.7  | 99.7 | 99.7  | 99.7 | 99.7  | 99.7  | 99.7 | 99.7 | 99.7 | 99.8 | 99.8 | 99.7 | 99.5  | 99.5  | 99.7 | 99.5  |      |    |
| 27 | RVA/Human-wt/ZMB/UFS-NGS-MRC-DPRU16639/2016/G2P4 | 99.8  | 99.8  | 99.6 | 99.7  | 99.7  | 99.7  | 99.7 | 99.7  | 99.6 | 99.7 | 99.8  | 99.8 | 99.7  | 99.8 | 99.8  | 99.8  | 99.8 | 99.9 | 99.9 | 99.8 | 99.7 | 99.6 | 99.6  | 99.6  | 99.7 | 99.6  | 99.8 |    |
| 28 | RVA/Human-wt/ZMB/UFS-NGS-MRC-DPRU16601/2016/G2P4 | 99.7  | 99.7  | 99.5 | 99.7  | 99.6  | 99.6  | 99.6 | 99.6  | 99.5 | 99.6 | 99.7  | 99.7 | 99.7  | 99.7 | 99.7  | 99.7  | 99.7 | 99.7 | 99.8 | 99.8 | 99.7 | 99.5 | 99.5  | 99.7  | 99.5 | 100.0 | 99.8 |    |
| 29 | RVA/Human-wt/ZMB/UFS-NGS-MRC-DPRU16646/2016/G2P4 | 99.8  | 99.8  | 99.6 | 99.7  | 99.7  | 99.7  | 99.7 | 99.7  | 99.6 | 99.7 | 99.8  | 99.8 | 99.7  | 99.8 | 99.8  | 99.8  | 99.8 | 99.9 | 99.9 | 99.8 | 99.6 | 99.6 | 100.0 | 99.6  | 99.7 | 99.7  | 99.9 |    |

VP6

|    |                                                  | 1    | 2     | 3     | 4    | 5     | 6    | 7    | 8     | 9     | 10    | 11    | 12    | 13    | 14   | 15    | 16    | 17    | 18    | 19    | 20    | 21    | 22    | 23   | 24   | 25   | 26   | 27   | 28   | 29 |
|----|--------------------------------------------------|------|-------|-------|------|-------|------|------|-------|-------|-------|-------|-------|-------|------|-------|-------|-------|-------|-------|-------|-------|-------|------|------|------|------|------|------|----|
| 1  | RVA/Human-wt/ZMB/UFS-NGS-MRC-DPRU1724/2012/G2P4  |      |       |       |      |       |      |      |       |       |       |       |       |       |      |       |       |       |       |       |       |       |       |      |      |      |      |      |      |    |
| 2  | RVA/Human-wt/ZMB/UFS-NGS-MRC-DPRU4699/2014/G2P4  | 97.6 |       |       |      |       |      |      |       |       |       |       |       |       |      |       |       |       |       |       |       |       |       |      |      |      |      |      |      |    |
| 3  | RVA/Human-wt/ZMB/UFS-NGS-MRC-DPRU4705/2014/G2P4  | 99.9 | 97.6  |       |      |       |      |      |       |       |       |       |       |       |      |       |       |       |       |       |       |       |       |      |      |      |      |      |      |    |
| 4  | RVA/Human-wt/ZMB/UFS-NGS-MRC-DPRU4714/2014/G2P4  | 99.7 | 97.6  | 99.8  |      |       |      |      |       |       |       |       |       |       |      |       |       |       |       |       |       |       |       |      |      |      |      |      |      |    |
| 5  | RVA/Human-wt/ZMB/UFS-NGS-MRC-DPRU4718/2014/G2P4  | 99.9 | 97.6  | 100.0 | 99.8 |       |      |      |       |       |       |       |       |       |      |       |       |       |       |       |       |       |       |      |      |      |      |      |      |    |
| 6  | RVA/Human-wt/ZMB/UFS-NGS-MRC-DPRU4736/2014/G2P4  | 97.6 | 100.0 | 97.6  | 97.6 | 97.6  |      |      |       |       |       |       |       |       |      |       |       |       |       |       |       |       |       |      |      |      |      |      |      |    |
| 7  | RVA/Human-wt/ZMB/UFS-NGS-MRC-DPRU4770/2014/G2P4  | 97.6 | 99.9  | 97.6  | 97.6 | 97.6  | 99.9 |      |       |       |       |       |       |       |      |       |       |       |       |       |       |       |       |      |      |      |      |      |      |    |
| 8  | RVA/Human-wt/ZMB/UFS-NGS-MRC-DPRU4819/2014/G2P4  | 99.9 | 97.6  | 100.0 | 99.8 | 100.0 | 97.6 | 97.6 |       |       |       |       |       |       |      |       |       |       |       |       |       |       |       |      |      |      |      |      |      |    |
| 9  | RVA/Human-wt/ZMB/UFS-NGS-MRC-DPRU9393/2015/G2P4  | 99.7 | 97.4  | 99.7  | 99.5 | 99.7  | 97.4 | 97.4 | 99.7  |       |       |       |       |       |      |       |       |       |       |       |       |       |       |      |      |      |      |      |      |    |
| 10 | RVA/Human-wt/ZMB/UFS-NGS-MRC-DPRU9420/2015/G2P4  | 99.8 | 97.5  | 99.7  | 99.6 | 99.7  | 97.5 | 97.5 | 99.7  | 99.9  |       |       |       |       |      |       |       |       |       |       |       |       |       |      |      |      |      |      |      |    |
| 11 | RVA/Human-wt/ZMB/UFS-NGS-MRC-DPRU9438/2015/G2P4  | 99.7 | 97.4  | 99.7  | 99.5 | 99.7  | 97.4 | 97.4 | 99.7  | 100.0 | 99.9  |       |       |       |      |       |       |       |       |       |       |       |       |      |      |      |      |      |      |    |
| 12 | RVA/Human-wt/ZMB/UFS-NGS-MRC-DPRU9464/2015/G2P4  | 99.8 | 97.5  | 99.7  | 99.6 | 99.7  | 97.5 | 97.5 | 99.7  | 99.9  | 100.0 | 99.9  |       |       |      |       |       |       |       |       |       |       |       |      |      |      |      |      |      |    |
| 13 | RVA/Human-wt/ZMB/UFS-NGS-MRC-DPRU9475/2015/G2P4  | 99.7 | 97.4  | 99.7  | 99.5 | 99.7  | 97.4 | 97.4 | 99.7  | 100.0 | 99.9  | 100.0 | 99.9  |       |      |       |       |       |       |       |       |       |       |      |      |      |      |      |      |    |
| 14 | RVA/Human-wt/ZMB/UFS-NGS-MRC-DPRU9495/2015/G2P4  | 99.7 | 97.4  | 99.7  | 99.5 | 99.7  | 97.4 | 97.4 | 99.7  | 100.0 | 99.9  | 100.0 | 99.9  | 100.0 |      |       |       |       |       |       |       |       |       |      |      |      |      |      |      |    |
| 15 | RVA/Human-wt/ZMB/UFS-NGS-MRC-DPRU9502/2015/G2P4  | 99.8 | 97.5  | 99.7  | 99.6 | 99.7  | 97.5 | 97.5 | 99.7  | 99.9  | 100.0 | 99.9  | 100.0 | 99.9  | 99.9 |       |       |       |       |       |       |       |       |      |      |      |      |      |      |    |
| 16 | RVA/Human-wt/ZMB/UFS-NGS-MRC-DPRU9503/2015/G2P4  | 99.8 | 97.5  | 99.7  | 99.6 | 99.7  | 97.5 | 97.5 | 99.7  | 99.9  | 100.0 | 99.9  | 100.0 | 99.9  | 99.9 | 100.0 |       |       |       |       |       |       |       |      |      |      |      |      |      |    |
| 17 | RVA/Human-wt/ZMB/UFS-NGS-MRC-DPRU9515/2015/G2P4  | 99.8 | 97.5  | 99.7  | 99.6 | 99.7  | 97.5 | 97.5 | 99.7  | 99.9  | 100.0 | 99.9  | 100.0 | 99.9  | 99.9 | 100.0 | 100.0 |       |       |       |       |       |       |      |      |      |      |      |      |    |
| 18 | RVA/Human-wt/ZMB/UFS-NGS-MRC-DPRU9556/2015/G2P4  | 99.8 | 97.5  | 99.7  | 99.6 | 99.7  | 97.5 | 97.5 | 99.7  | 99.9  | 100.0 | 99.9  | 100.0 | 99.9  | 99.9 | 100.0 | 100.0 | 100.0 |       |       |       |       |       |      |      |      |      |      |      |    |
| 19 | RVA/Human-wt/ZMB/UFS-NGS-MRC-DPRU9559/2015/G2P4  | 99.8 | 97.5  | 99.7  | 99.6 | 99.7  | 97.5 | 97.5 | 99.7  | 99.9  | 100.0 | 99.9  | 100.0 | 99.9  | 99.9 | 100.0 | 100.0 | 100.0 | 100.0 |       |       |       |       |      |      |      |      |      |      |    |
| 20 | RVA/Human-wt/ZMB/UFS-NGS-MRC-DPRU13231/2016/G2P4 | 99.8 | 97.5  | 99.7  | 99.6 | 99.7  | 97.5 | 97.5 | 99.7  | 99.9  | 100.0 | 99.9  | 100.0 | 99.9  | 99.9 | 100.0 | 100.0 | 100.0 | 100.0 | 100.0 |       |       |       |      |      |      |      |      |      |    |
| 21 | RVA/Human-wt/ZMB/UFS-NGS-MRC-DPRU13301/2016/G2P4 | 99.8 | 97.5  | 99.7  | 99.6 | 99.7  | 97.5 | 97.5 | 99.7  | 99.9  | 100.0 | 99.9  | 100.0 | 99.9  | 99.9 | 100.0 | 100.0 | 100.0 | 100.0 | 100.0 | 100.0 |       |       |      |      |      |      |      |      |    |
| 22 | RVA/Human-wt/ZMB/UFS-NGS-MRC-DPRU13352/2016/G2P4 | 99.8 | 97.5  | 99.7  | 99.6 | 99.7  | 97.5 | 97.5 | 99.7  | 99.9  | 100.0 | 99.9  | 100.0 | 99.9  | 99.9 | 100.0 | 100.0 | 100.0 | 100.0 | 100.0 | 100.0 | 100.0 |       |      |      |      |      |      |      |    |
| 23 | RVA/Human-wt/ZMB/UFS-NGS-MRC-DPRU13545/2016/G2P4 | 99.8 | 97.5  | 99.7  | 99.6 | 99.7  | 97.5 | 97.5 | 99.7  | 99.9  | 100.0 | 99.9  | 100.0 | 99.9  | 99.9 | 100.0 | 100.0 | 100.0 | 100.0 | 100.0 | 100.0 | 100.0 | 100.0 |      |      |      |      |      |      |    |
| 24 | RVA/Human-wt/ZMB/UFS-NGS-MRC-DPRU16599/2016/G2P4 | 99.3 | 97.0  | 99.2  | 99.1 | 99.2  | 97.0 | 97.0 | 99.2  | 99.4  | 99.5  | 99.4  | 99.5  | 99.4  | 99.4 | 99.5  | 99.5  | 99.5  | 99.5  | 99.5  | 99.5  | 99.5  | 99.5  | 99.5 | 99.5 |      |      |      |      |    |
| 25 | RVA/Human-wt/ZMB/UFS-NGS-MRC-DPRU16601/2016/G2P4 | 99.7 | 97.3  | 99.6  | 99.4 | 99.6  | 97.3 | 97.3 | 99.6  | 99.7  | 99.8  | 99.7  | 99.8  | 99.7  | 99.7 | 99.8  | 99.8  | 99.8  | 99.8  | 99.8  | 99.8  | 99.8  | 99.8  | 99.8 | 99.8 | 99.7 |      |      |      |    |
| 26 | RVA/Human-wt/ZMB/UFS-NGS-MRC-DPRU16699/2016/G2P4 | 99.6 | 97.2  | 99.5  | 99.3 | 99.5  | 97.2 | 97.2 | 99.5  | 99.7  | 99.7  | 99.7  | 99.7  | 99.7  | 99.7 | 99.7  | 99.7  | 99.7  | 99.7  | 99.7  | 99.7  | 99.7  | 99.7  | 99.7 | 99.7 | 99.6 | 99.9 |      |      |    |
| 27 | RVA/Human-wt/ZAM/UFS-NGS-MRC-DPRU1729/2012/G2P4  | 99.8 | 97.5  | 99.7  | 99.6 | 99.7  | 97.5 | 97.5 | 99.7  | 99.6  | 99.7  | 99.6  | 99.7  | 99.6  | 99.6 | 99.7  | 99.7  | 99.7  | 99.7  | 99.7  | 99.7  | 99.7  | 99.7  | 99.7 | 99.7 | 99.3 | 99.5 | 99.4 |      |    |
| 28 | RVA/Human-wt/ZMB/UFS-NGS-MRC-DPRU4699/2014/G2P4  | 99.9 | 97.6  | 100.0 | 99.8 | 100.0 | 97.6 | 97.6 | 100.0 | 99.7  | 99.7  | 99.7  | 99.7  | 99.7  | 99.7 | 99.7  | 99.7  | 99.7  | 99.7  | 99.7  | 99.7  | 99.7  | 99.7  | 99.7 | 99.7 | 99.2 | 99.6 | 99.5 | 99.7 |    |
| 29 | RVA/Human-wt/ZMB/UFS-NGS-MRC-DPRU16646/2016/G2P4 | 99.7 | 97.3  | 99.6  | 99.4 | 99.6  | 97.3 | 97.3 | 99.6  | 99.7  | 99.8  | 99.7  | 99.8  | 99.7  | 99.7 | 99.8  | 99.8  | 99.8  | 99.8  | 99.8  | 99.8  | 99.8  | 99.8  | 99.8 | 99.6 | 99.7 | 99.6 | 99.5 | 99.6 |    |

VP7

|    |                                                  | 1     | 2     | 3     | 4     | 5     | 6     | 7    | 8    | 9     | 10   | 11    | 12    | 13    | 14   | 15    | 16    | 17    | 18   | 19    | 20   | 21   | 22   | 23   | 24   | 25   | 26    | 27   | 28   | 29 |
|----|--------------------------------------------------|-------|-------|-------|-------|-------|-------|------|------|-------|------|-------|-------|-------|------|-------|-------|-------|------|-------|------|------|------|------|------|------|-------|------|------|----|
| 1  | RVA/Human-wt/ZAM/UFS-NGS-MRC-DPRU1724/2012/G2P4  |       |       |       |       |       |       |      |      |       |      |       |       |       |      |       |       |       |      |       |      |      |      |      |      |      |       |      |      |    |
| 2  | RVA/Human-wt/ZAM/UFS-NGS-MRC-DPRU1729/2012/G2P4  | 100.0 |       |       |       |       |       |      |      |       |      |       |       |       |      |       |       |       |      |       |      |      |      |      |      |      |       |      |      |    |
| 3  | RVA/Human-wt/ZAM/UFS-NGS-MRC-DPRU4691/2014/G2P4  | 100.0 | 100.0 |       |       |       |       |      |      |       |      |       |       |       |      |       |       |       |      |       |      |      |      |      |      |      |       |      |      |    |
| 4  | RVA/Human-wt/ZAM/UFS-NGS-MRC-DPRU4699/2014/G2P4  | 99.9  | 99.9  | 99.9  |       |       |       |      |      |       |      |       |       |       |      |       |       |       |      |       |      |      |      |      |      |      |       |      |      |    |
| 5  | RVA/Human-wt/ZAM/UFS-NGS-MRC-DPRU4705/2014/G2P4  | 100.0 | 100.0 | 100.0 | 99.9  |       |       |      |      |       |      |       |       |       |      |       |       |       |      |       |      |      |      |      |      |      |       |      |      |    |
| 6  | RVA/Human-wt/ZAM/UFS-NGS-MRC-DPRU4714/2014/G2P4  | 100.0 | 100.0 | 100.0 | 99.9  | 100.0 |       |      |      |       |      |       |       |       |      |       |       |       |      |       |      |      |      |      |      |      |       |      |      |    |
| 7  | RVA/Human-wt/ZAM/UFS-NGS-MRC-DPRU4718/2014/G2P4  | 97.6  | 97.6  | 97.6  | 97.5  | 97.6  | 97.6  |      |      |       |      |       |       |       |      |       |       |       |      |       |      |      |      |      |      |      |       |      |      |    |
| 8  | RVA/Human-wt/ZAM/UFS-NGS-MRC-DPRU4736/2014/G2P4  | 99.9  | 99.9  | 99.9  | 100.0 | 99.9  | 99.9  | 97.5 |      |       |      |       |       |       |      |       |       |       |      |       |      |      |      |      |      |      |       |      |      |    |
| 9  | RVA/Human-wt/ZAM/UFS-NGS-MRC-DPRU4770/2014/G2P4  | 100.0 | 100.0 | 100.0 | 99.9  | 100.0 | 100.0 | 97.6 | 99.9 |       |      |       |       |       |      |       |       |       |      |       |      |      |      |      |      |      |       |      |      |    |
| 10 | RVA/Human-wt/ZAM/UFS-NGS-MRC-DPRU4819/2014/G2P4  | 100.0 | 100.0 | 100.0 | 99.9  | 100.0 | 100.0 | 97.6 | 99.9 | 100.0 |      |       |       |       |      |       |       |       |      |       |      |      |      |      |      |      |       |      |      |    |
| 11 | RVA/Human-wt/ZAM/UFS-NGS-MRC-DPRU9393/2015/G2P4  | 99.9  | 99.9  | 99.9  | 99.8  | 99.9  | 99.9  | 97.5 | 99.8 | 99.9  | 99.9 |       |       |       |      |       |       |       |      |       |      |      |      |      |      |      |       |      |      |    |
| 12 | RVA/Human-wt/ZAM/UFS-NGS-MRC-DPRU9420/2015/G2P4  | 99.9  | 99.9  | 99.9  | 99.8  | 99.9  | 99.9  | 97.5 | 99.8 | 99.9  | 99.9 | 100.0 |       |       |      |       |       |       |      |       |      |      |      |      |      |      |       |      |      |    |
| 13 | RVA/Human-wt/ZAM/UFS-NGS-MRC-DPRU9438/2015/G2P4  | 99.9  | 99.9  | 99.9  | 99.8  | 99.9  | 99.9  | 97.5 | 99.8 | 99.9  | 99.9 | 100.0 | 100.0 |       |      |       |       |       |      |       |      |      |      |      |      |      |       |      |      |    |
| 14 | RVA/Human-wt/ZAM/UFS-NGS-MRC-DPRU9464/2015/G2P4  | 99.7  | 99.7  | 99.7  | 99.6  | 99.7  | 99.7  | 97.3 | 99.6 | 99.7  | 99.7 | 99.8  | 99.8  | 99.8  |      |       |       |       |      |       |      |      |      |      |      |      |       |      |      |    |
| 15 | RVA/Human-wt/ZAM/UFS-NGS-MRC-DPRU9475/2015/G2P4  | 99.9  | 99.9  | 99.9  | 99.8  | 99.9  | 99.9  | 97.5 | 99.8 | 99.9  | 99.9 | 100.0 | 100.0 | 100.0 | 99.8 |       |       |       |      |       |      |      |      |      |      |      |       |      |      |    |
| 16 | RVA/Human-wt/ZAM/UFS-NGS-MRC-DPRU9495/2015/G2P4  | 99.9  | 99.9  | 99.9  | 99.8  | 99.9  | 99.9  | 97.5 | 99.8 | 99.9  | 99.9 | 100.0 | 100.0 | 100.0 | 99.8 | 100.0 |       |       |      |       |      |      |      |      |      |      |       |      |      |    |
| 17 | RVA/Human-wt/ZAM/UFS-NGS-MRC-DPRU9502/2015/G2P4  | 99.9  | 99.9  | 99.9  | 99.8  | 99.9  | 99.9  | 97.5 | 99.8 | 99.9  | 99.9 | 100.0 | 100.0 | 100.0 | 99.8 | 100.0 | 100.0 |       |      |       |      |      |      |      |      |      |       |      |      |    |
| 18 | RVA/Human-wt/ZAM/UFS-NGS-MRC-DPRU9503/2015/G2P4  | 99.8  | 99.8  | 99.8  | 99.7  | 99.8  | 99.8  | 97.4 | 99.7 | 99.8  | 99.8 | 99.9  | 99.9  | 99.9  | 99.7 | 99.9  | 99.9  | 99.9  |      |       |      |      |      |      |      |      |       |      |      |    |
| 19 | RVA/Human-wt/ZAM/UFS-NGS-MRC-DPRU9515/2015/G2P4  | 99.9  | 99.9  | 99.9  | 99.8  | 99.9  | 99.9  | 97.5 | 99.8 | 99.9  | 99.9 | 100.0 | 100.0 | 100.0 | 99.8 | 100.0 | 100.0 | 100.0 | 99.9 |       |      |      |      |      |      |      |       |      |      |    |
| 20 | RVA/Human-wt/ZAM/UFS-NGS-MRC-DPRU9556/2015/G2P4  | 99.9  | 99.9  | 99.9  | 99.8  | 99.9  | 99.9  | 97.5 | 99.8 | 99.9  | 99.9 | 100.0 | 100.0 | 100.0 | 99.8 | 100.0 | 100.0 | 100.0 | 99.9 | 100.0 |      |      |      |      |      |      |       |      |      |    |
| 21 | RVA/Human-wt/ZAM/UFS-NGS-MRC-DPRU9559/2015/G2P4  | 99.8  | 99.8  | 99.8  | 99.7  | 99.8  | 99.8  | 97.4 | 99.7 | 99.8  | 99.8 | 99.9  | 99.9  | 99.9  | 99.7 | 99.9  | 99.9  | 99.9  | 99.8 | 99.9  | 99.9 |      |      |      |      |      |       |      |      |    |
| 22 | RVA/Human-wt/ZAM/UFS-NGS-MRC-DPRU13231/2016/G2P4 | 99.7  | 99.7  | 99.7  | 99.6  | 99.7  | 99.7  | 97.3 | 99.6 | 99.7  | 99.7 | 99.8  | 99.8  | 99.8  | 99.6 | 99.8  | 99.8  | 99.8  | 99.7 | 99.8  | 99.8 | 99.7 |      |      |      |      |       |      |      |    |
| 23 | RVA/Human-wt/ZAM/UFS-NGS-MRC-DPRU13301/2016/G2P4 | 99.6  | 99.6  | 99.6  | 99.5  | 99.6  | 99.6  | 97.2 | 99.5 | 99.6  | 99.6 | 99.7  | 99.7  | 99.7  | 99.5 | 99.7  | 99.7  | 99.7  | 99.6 | 99.7  | 99.7 | 99.6 | 99.7 |      |      |      |       |      |      |    |
| 24 | RVA/Human-wt/ZAM/UFS-NGS-MRC-DPRU13352/2016/G2P4 | 99.8  | 99.8  | 99.8  | 99.7  | 99.8  | 99.8  | 97.6 | 99.7 | 99.8  | 99.8 | 99.9  | 99.9  | 99.9  | 99.7 | 99.9  | 99.9  | 99.9  | 99.8 | 99.9  | 99.9 | 99.9 | 99.8 |      |      |      |       |      |      |    |
| 25 | RVA/Human-wt/ZAM/UFS-NGS-MRC-DPRU13545/2016/G2P4 | 99.5  | 99.5  | 99.5  | 99.4  | 99.5  | 99.5  | 97.1 | 99.4 | 99.5  | 99.5 | 99.6  | 99.6  | 99.6  | 99.4 | 99.6  | 99.6  | 99.6  | 99.5 | 99.6  | 99.6 | 99.5 | 99.6 | 99.9 | 99.5 |      |       |      |      |    |
| 26 | RVA/Human-wt/ZAM/UFS-NGS-MRC-DPRU16599/2016/G2P4 | 99.7  | 99.7  | 99.7  | 99.6  | 99.7  | 99.7  | 97.3 | 99.6 | 99.7  | 99.7 | 99.8  | 99.8  | 99.8  | 99.6 | 99.8  | 99.8  | 99.8  | 99.7 | 99.8  | 99.8 | 99.7 | 99.6 | 99.5 | 99.7 | 99.4 |       |      |      |    |
| 27 | RVA/Human-wt/ZAM/UFS-NGS-MRC-DPRU16601/2016/G2P4 | 99.7  | 99.7  | 99.7  | 99.6  | 99.7  | 99.7  | 97.3 | 99.6 | 99.7  | 99.7 | 99.8  | 99.8  | 99.8  | 99.6 | 99.8  | 99.8  | 99.8  | 99.7 | 99.8  | 99.8 | 99.7 | 99.6 | 99.5 | 99.7 | 99.4 | 100.0 |      |      |    |
| 28 | RVA/Human-wt/ZAM/UFS-NGS-MRC-DPRU16639/2016/G2P4 | 99.7  | 99.7  | 99.7  | 99.6  | 99.7  | 99.7  | 97.3 | 99.6 | 99.7  | 99.7 | 99.8  | 99.8  | 99.8  | 99.6 | 99.8  | 99.8  | 99.8  | 99.7 | 99.8  | 99.8 | 99.7 | 99.6 | 99.5 | 99.7 | 99.4 | 99.8  | 99.8 |      |    |
| 29 | RVA/Human-wt/ZAM/UFS-NGS-MRC-DPRU16646/2016/G2P4 | 99.8  | 99.8  | 99.8  | 99.7  | 99.8  | 99.8  | 97.6 | 99.7 | 99.8  | 99.8 | 99.9  | 99.9  | 99.9  | 99.7 | 99.9  | 99.9  | 99.9  | 99.8 | 99.9  | 99.9 | 99.8 | 99.7 | 99.6 | 99.5 | 99.7 | 99.7  | 99.7 | 99.7 |    |

## NSP1

[illegible]

## NSP2

|    |                                                  | 1     | 2     | 3    | 4     | 5     | 6    | 7    | 8    | 9    | 10   | 11    | 12    | 13    | 14    | 15    | 16    | 17    | 18    | 19    | 20    | 21   | 22   | 23    | 24    | 25   | 26   | 27   | 28    | 29   |
|----|--------------------------------------------------|-------|-------|------|-------|-------|------|------|------|------|------|-------|-------|-------|-------|-------|-------|-------|-------|-------|-------|------|------|-------|-------|------|------|------|-------|------|
| 1  | RVA/Human-wt/ZMB/UFS-NGS-MRC-DPRU1724/2012/G2P4  |       |       |      |       |       |      |      |      |      |      |       |       |       |       |       |       |       |       |       |       |      |      |       |       |      |      |      |       |      |
| 2  | RVA/Human-wt/ZMB/UFS-NGS-MRC-DPRU1729/2012/G2P4  | 100.0 |       |      |       |       |      |      |      |      |      |       |       |       |       |       |       |       |       |       |       |      |      |       |       |      |      |      |       |      |
| 3  | RVA/Human-wt/ZMB/UFS-NGS-MRC-DPRU4691/2014/G2P4  | 99.8  | 99.8  |      |       |       |      |      |      |      |      |       |       |       |       |       |       |       |       |       |       |      |      |       |       |      |      |      |       |      |
| 4  | RVA/Human-wt/ZMB/UFS-NGS-MRC-DPRU4699/2014/G2P4  | 99.9  | 99.9  | 99.7 |       |       |      |      |      |      |      |       |       |       |       |       |       |       |       |       |       |      |      |       |       |      |      |      |       |      |
| 5  | RVA/Human-wt/ZMB/UFS-NGS-MRC-DPRU4705/2014/G2P4  | 99.9  | 99.9  | 99.9 | 99.8  |       |      |      |      |      |      |       |       |       |       |       |       |       |       |       |       |      |      |       |       |      |      |      |       |      |
| 6  | RVA/Human-wt/ZMB/UFS-NGS-MRC-DPRU4714/2014/G2P4  | 99.9  | 99.9  | 99.9 | 99.8  | 100.0 |      |      |      |      |      |       |       |       |       |       |       |       |       |       |       |      |      |       |       |      |      |      |       |      |
| 7  | RVA/Human-wt/ZMB/UFS-NGS-MRC-DPRU4718/2014/G2P4  | 99.8  | 99.8  | 99.8 | 99.7  | 99.9  | 99.9 |      |      |      |      |       |       |       |       |       |       |       |       |       |       |      |      |       |       |      |      |      |       |      |
| 8  | RVA/Human-wt/ZMB/UFS-NGS-MRC-DPRU4736/2014/G2P4  | 99.9  | 99.9  | 99.7 | 100.0 | 99.8  | 99.8 | 99.7 |      |      |      |       |       |       |       |       |       |       |       |       |       |      |      |       |       |      |      |      |       |      |
| 9  | RVA/Human-wt/ZMB/UFS-NGS-MRC-DPRU4770/2012/G2P4  | 99.8  | 99.8  | 99.6 | 99.9  | 99.7  | 99.7 | 99.6 | 99.9 |      |      |       |       |       |       |       |       |       |       |       |       |      |      |       |       |      |      |      |       |      |
| 10 | RVA/Human-wt/ZMB/UFS-NGS-MRC-DPRU4819/2014/G2P4  | 99.8  | 99.8  | 99.8 | 99.7  | 99.9  | 99.9 | 99.8 | 99.7 | 99.6 |      |       |       |       |       |       |       |       |       |       |       |      |      |       |       |      |      |      |       |      |
| 11 | RVA/Human-wt/ZMB/UFS-NGS-MRC-DPRU9393/2015/G2P4  | 100.0 | 100.0 | 99.8 | 99.9  | 99.9  | 99.9 | 99.8 | 99.9 | 99.8 | 99.8 |       |       |       |       |       |       |       |       |       |       |      |      |       |       |      |      |      |       |      |
| 12 | RVA/Human-wt/ZMB/UFS-NGS-MRC-DPRU9420/2015/G2P4  | 100.0 | 100.0 | 99.8 | 99.9  | 99.9  | 99.9 | 99.8 | 99.9 | 99.8 | 99.8 | 100.0 |       |       |       |       |       |       |       |       |       |      |      |       |       |      |      |      |       |      |
| 13 | RVA/Human-wt/ZMB/UFS-NGS-MRC-DPRU9438/2015/G2P4  | 100.0 | 100.0 | 99.8 | 99.9  | 99.9  | 99.9 | 99.8 | 99.9 | 99.8 | 99.8 | 100.0 | 100.0 |       |       |       |       |       |       |       |       |      |      |       |       |      |      |      |       |      |
| 14 | RVA/Human-wt/ZMB/UFS-NGS-MRC-DPRU9464/2015/G2P4  | 100.0 | 100.0 | 99.8 | 99.9  | 99.9  | 99.9 | 99.8 | 99.9 | 99.8 | 99.8 | 100.0 | 100.0 | 100.0 |       |       |       |       |       |       |       |      |      |       |       |      |      |      |       |      |
| 15 | RVA/Human-wt/ZMB/UFS-NGS-MRC-DPRU9475/2015/G2P4  | 100.0 | 100.0 | 99.8 | 99.9  | 99.9  | 99.9 | 99.8 | 99.9 | 99.8 | 99.8 | 100.0 | 100.0 | 100.0 | 100.0 |       |       |       |       |       |       |      |      |       |       |      |      |      |       |      |
| 16 | RVA/Human-wt/ZMB/UFS-NGS-MRC-DPRU9495/2015/G2P4  | 100.0 | 100.0 | 99.8 | 99.9  | 99.9  | 99.9 | 99.8 | 99.9 | 99.8 | 99.8 | 100.0 | 100.0 | 100.0 | 100.0 | 100.0 |       |       |       |       |       |      |      |       |       |      |      |      |       |      |
| 17 | RVA/Human-wt/ZMB/UFS-NGS-MRC-DPRU9503/2015/G2P4  | 100.0 | 100.0 | 99.8 | 99.9  | 99.9  | 99.9 | 99.8 | 99.9 | 99.8 | 99.8 | 100.0 | 100.0 | 100.0 | 100.0 | 100.0 | 100.0 |       |       |       |       |      |      |       |       |      |      |      |       |      |
| 18 | RVA/Human-wt/ZMB/UFS-NGS-MRC-DPRU9502/2015/G2P4  | 100.0 | 100.0 | 99.8 | 99.9  | 99.9  | 99.9 | 99.8 | 99.9 | 99.8 | 99.8 | 100.0 | 100.0 | 100.0 | 100.0 | 100.0 | 100.0 | 100.0 |       |       |       |      |      |       |       |      |      |      |       |      |
| 19 | RVA/Human-wt/ZMB/UFS-NGS-MRC-DPRU9515/2015/G2P4  | 100.0 | 100.0 | 99.8 | 99.9  | 99.9  | 99.9 | 99.8 | 99.9 | 99.8 | 99.8 | 100.0 | 100.0 | 100.0 | 100.0 | 100.0 | 100.0 | 100.0 | 100.0 |       |       |      |      |       |       |      |      |      |       |      |
| 20 | RVA/Human-wt/ZMB/UFS-NGS-MRC-DPRU9556/2015/G2P4  | 99.9  | 99.9  | 99.7 | 99.8  | 99.8  | 99.8 | 99.7 | 99.8 | 99.7 | 99.7 | 99.9  | 99.9  | 99.9  | 99.9  | 99.9  | 99.9  | 99.9  | 99.9  | 99.9  |       |      |      |       |       |      |      |      |       |      |
| 21 | RVA/Human-wt/ZMB/UFS-NGS-MRC-DPRU9559/2015/G2P4  | 100.0 | 100.0 | 99.8 | 99.9  | 99.9  | 99.8 | 99.8 | 99.9 | 99.8 | 99.8 | 100.0 | 100.0 | 100.0 | 100.0 | 100.0 | 100.0 | 100.0 | 100.0 | 100.0 | 100.0 | 99.9 |      |       |       |      |      |      |       |      |
| 22 | RVA/Human-wt/ZMB/UFS-NGS-MRC-DPRU13231/2016/G2P4 | 99.8  | 99.8  | 99.6 | 99.7  | 99.7  | 99.7 | 99.6 | 99.7 | 99.6 | 99.6 | 99.8  | 99.8  | 99.8  | 99.8  | 99.8  | 99.8  | 99.8  | 99.8  | 99.8  | 99.8  | 99.7 | 99.8 |       |       |      |      |      |       |      |
| 23 | RVA/Human-wt/ZMB/UFS-NGS-MRC-DPRU13301/2016/G2P4 | 99.8  | 99.8  | 99.6 | 99.7  | 99.7  | 99.7 | 99.6 | 99.7 | 99.6 | 99.6 | 99.8  | 99.8  | 99.8  | 99.8  | 99.8  | 99.8  | 99.8  | 99.8  | 99.8  | 99.8  | 99.7 | 99.8 | 100.0 |       |      |      |      |       |      |
| 24 | RVA/Human-wt/ZMB/UFS-NGS-MRC-DPRU13352/2016/G2P4 | 99.9  | 99.9  | 99.7 | 99.8  | 99.8  | 99.8 | 99.7 | 99.8 | 99.7 | 99.7 | 99.9  | 99.9  | 99.9  | 99.8  | 99.9  | 99.9  | 99.9  | 99.9  | 99.9  | 99.9  | 99.8 | 99.9 | 99.7  | 99.7  |      |      |      |       |      |
| 25 | RVA/Human-wt/ZMB/UFS-NGS-MRC-DPRU13545/2016/G2P4 | 99.8  | 99.8  | 99.6 | 99.7  | 99.7  | 99.7 | 99.6 | 99.7 | 99.6 | 99.6 | 99.8  | 99.8  | 99.8  | 99.8  | 99.8  | 99.8  | 99.8  | 99.8  | 99.8  | 99.8  | 99.7 | 99.8 | 100.0 | 100.0 | 99.7 |      |      |       |      |
| 26 | RVA/Human-wt/ZMB/UFS-NGS-MRC-DPRU16599/2016/G2P4 | 99.9  | 99.9  | 99.7 | 99.8  | 99.8  | 99.8 | 99.7 | 99.8 | 99.7 | 99.7 | 99.9  | 99.9  | 99.9  | 99.9  | 99.9  | 99.9  | 99.9  | 99.9  | 99.9  | 99.9  | 99.8 | 99.9 | 99.7  | 99.7  | 99.8 | 99.7 |      |       |      |
| 27 | RVA/Human-wt/ZMB/UFS-NGS-MRC-DPRU16601/2016/G2P4 | 99.9  | 99.9  | 99.7 | 99.8  | 99.8  | 99.8 | 99.7 | 99.8 | 99.7 | 99.7 | 99.9  | 99.9  | 99.9  | 99.9  | 99.9  | 99.9  | 99.9  | 99.9  | 99.9  | 99.9  | 99.8 | 99.9 | 99.7  | 99.7  | 99.8 | 99.8 | 99.7 | 100.0 |      |
| 28 | RVA/Human-wt/ZMB/UFS-NGS-MRC-DPRU16639/2016/G2P4 | 99.8  | 99.8  | 99.6 | 99.7  | 99.7  | 99.7 | 99.6 | 99.7 | 99.6 | 99.6 | 99.8  | 99.8  | 99.8  | 99.8  | 99.8  | 99.8  | 99.8  | 99.8  | 99.8  | 99.8  | 99.7 | 99.8 | 99.6  | 99.6  | 99.7 | 99.6 | 99.7 | 99.7  |      |
| 29 | RVA/Human-wt/ZMB/UFS-NGS-MRC-DPRU16646/2016/G2P4 | 99.9  | 99.9  | 99.7 | 99.8  | 99.8  | 99.8 | 99.7 | 99.8 | 99.7 | 99.7 | 99.9  | 99.9  | 99.9  | 99.9  | 99.9  | 99.9  | 99.9  | 99.9  | 99.9  | 99.8  | 99.9 | 99.7 | 99.7  | 100.0 | 99.7 | 99.8 | 99.8 | 99.7  | 99.7 |

NSP3

|    |                                                   | 1     | 2     | 3     | 4     | 5     | 6    | 7     | 8     | 9    | 10   | 11    | 12   | 13   | 14    | 15    | 16    | 17    | 18    | 19   | 20    | 21   | 22   | 23   | 24    | 25   | 26   | 27    | 28    | 29 |
|----|---------------------------------------------------|-------|-------|-------|-------|-------|------|-------|-------|------|------|-------|------|------|-------|-------|-------|-------|-------|------|-------|------|------|------|-------|------|------|-------|-------|----|
| 1  | RVA/Human-wt/ZMB/IFS-NGS-MRC-DPRU1724/2012/G2P4   |       |       |       |       |       |      |       |       |      |      |       |      |      |       |       |       |       |       |      |       |      |      |      |       |      |      |       |       |    |
| 2  | RVA/Human-wt/ZMB/IFS-NGS-MRC-DPRU1729/2012/G2P4   | 100.0 |       |       |       |       |      |       |       |      |      |       |      |      |       |       |       |       |       |      |       |      |      |      |       |      |      |       |       |    |
| 3  | RVA/Human-wt/ZMB/IFS-NGS-MRC-DPRU4691/2014/G2P4   | 99.9  | 99.9  |       |       |       |      |       |       |      |      |       |      |      |       |       |       |       |       |      |       |      |      |      |       |      |      |       |       |    |
| 4  | RVA/Human-wt/ZMB/IFS-NGS-MRC-DPRU4699/2014/G2P4   | 100.0 | 100.0 | 99.9  |       |       |      |       |       |      |      |       |      |      |       |       |       |       |       |      |       |      |      |      |       |      |      |       |       |    |
| 5  | RVA/Human-wt/ZMB/IFS-NGS-MRC-DPRU4705/2014/G2P4   | 99.9  | 99.9  | 100.0 | 99.9  |       |      |       |       |      |      |       |      |      |       |       |       |       |       |      |       |      |      |      |       |      |      |       |       |    |
| 6  | RVA/Human-wt/ZMB/IFS-NGS-MRC-DPRU4714/2014/G2P4   | 99.9  | 99.9  | 100.0 | 99.9  | 100.0 |      |       |       |      |      |       |      |      |       |       |       |       |       |      |       |      |      |      |       |      |      |       |       |    |
| 7  | RVA/Human-wt/ZMB/IFS-NGS-MRC-DPRU4736/2014/G2P4   | 100.0 | 100.0 | 99.9  | 100.0 | 99.9  | 99.9 |       |       |      |      |       |      |      |       |       |       |       |       |      |       |      |      |      |       |      |      |       |       |    |
| 8  | RVA/Human-wt/ZMB/IFS-NGS-MRC-DPRU4736_b/2014/G2P4 | 100.0 | 100.0 | 99.9  | 100.0 | 99.9  | 99.9 | 100.0 |       |      |      |       |      |      |       |       |       |       |       |      |       |      |      |      |       |      |      |       |       |    |
| 9  | RVA/Human-wt/ZMB/IFS-NGS-MRC-DPRU4770/2014/G2P4   | 100.0 | 100.0 | 99.9  | 100.0 | 99.9  | 99.9 | 100.0 | 100.0 |      |      |       |      |      |       |       |       |       |       |      |       |      |      |      |       |      |      |       |       |    |
| 10 | RVA/Human-wt/ZMB/IFS-NGS-MRC-DPRU4819/2014/G2P4   | 99.8  | 99.8  | 99.9  | 99.8  | 99.9  | 99.9 | 99.8  | 99.8  | 99.8 |      |       |      |      |       |       |       |       |       |      |       |      |      |      |       |      |      |       |       |    |
| 11 | RVA/Human-wt/ZMB/IFS-NGS-MRC-DPRU9393/2015/G2P4   | 99.9  | 99.9  | 99.8  | 99.9  | 99.8  | 99.8 | 99.9  | 99.9  | 99.9 | 99.7 |       |      |      |       |       |       |       |       |      |       |      |      |      |       |      |      |       |       |    |
| 12 | RVA/Human-wt/ZMB/IFS-NGS-MRC-DPRU9420/2015/G2P4   | 99.8  | 99.8  | 99.7  | 99.8  | 99.7  | 99.7 | 99.8  | 99.8  | 99.8 | 99.6 | 99.9  |      |      |       |       |       |       |       |      |       |      |      |      |       |      |      |       |       |    |
| 13 | RVA/Human-wt/ZMB/IFS-NGS-MRC-DPRU9438/2015/G2P4   | 99.8  | 99.8  | 99.7  | 99.8  | 99.7  | 99.7 | 99.8  | 99.8  | 99.8 | 99.6 | 99.9  | 99.8 |      |       |       |       |       |       |      |       |      |      |      |       |      |      |       |       |    |
| 14 | RVA/Human-wt/ZMB/IFS-NGS-MRC-DPRU9464/2015/G2P4   | 99.9  | 99.9  | 99.8  | 99.9  | 99.8  | 99.8 | 99.9  | 99.9  | 99.9 | 99.7 | 100.0 | 99.9 | 99.9 |       |       |       |       |       |      |       |      |      |      |       |      |      |       |       |    |
| 15 | RVA/Human-wt/ZMB/IFS-NGS-MRC-DPRU9475/2015/G2P4   | 99.9  | 99.9  | 99.8  | 99.9  | 99.8  | 99.8 | 99.9  | 99.9  | 99.9 | 99.7 | 100.0 | 99.9 | 99.9 | 100.0 |       |       |       |       |      |       |      |      |      |       |      |      |       |       |    |
| 16 | RVA/Human-wt/ZMB/IFS-NGS-MRC-DPRU9475b/2015/G2P4  | 99.9  | 99.9  | 99.8  | 99.9  | 99.8  | 99.8 | 99.9  | 99.9  | 99.9 | 99.7 | 100.0 | 99.9 | 99.9 | 100.0 | 100.0 |       |       |       |      |       |      |      |      |       |      |      |       |       |    |
| 17 | RVA/Human-wt/ZMB/IFS-NGS-MRC-DPRU9502/2015/G2P4   | 99.9  | 99.9  | 99.8  | 99.9  | 99.8  | 99.8 | 99.9  | 99.9  | 99.9 | 99.7 | 100.0 | 99.9 | 99.9 | 100.0 | 100.0 | 100.0 |       |       |      |       |      |      |      |       |      |      |       |       |    |
| 18 | RVA/Human-wt/ZMB/IFS-NGS-MRC-DPRU9503/2015/G2P4   | 99.9  | 99.9  | 99.8  | 99.9  | 99.8  | 99.8 | 99.9  | 99.9  | 99.9 | 99.7 | 100.0 | 99.9 | 99.9 | 100.0 | 100.0 | 100.0 | 100.0 |       |      |       |      |      |      |       |      |      |       |       |    |
| 19 | RVA/Human-wt/ZMB/IFS-NGS-MRC-DPRU13301/2016/G2P4  | 99.5  | 99.5  | 99.4  | 99.5  | 99.4  | 99.4 | 99.5  | 99.5  | 99.5 | 99.2 | 99.6  | 99.5 | 99.5 | 99.6  | 99.6  | 99.6  | 99.6  | 99.6  |      |       |      |      |      |       |      |      |       |       |    |
| 20 | RVA/Human-wt/ZMB/IFS-NGS-MRC-DPRU9515/2015/G2P4   | 99.9  | 99.9  | 99.8  | 99.9  | 99.8  | 99.8 | 99.9  | 99.9  | 99.9 | 99.7 | 100.0 | 99.9 | 99.9 | 100.0 | 100.0 | 100.0 | 100.0 | 100.0 | 99.6 |       |      |      |      |       |      |      |       |       |    |
| 21 | RVA/Human-wt/ZMB/IFS-NGS-MRC-DPRU9556/2015/G2P4   | 99.8  | 99.8  | 99.7  | 99.8  | 99.7  | 99.7 | 99.8  | 99.8  | 99.8 | 99.6 | 99.9  | 99.8 | 99.8 | 99.9  | 99.9  | 99.9  | 99.9  | 99.9  | 99.5 | 99.9  |      |      |      |       |      |      |       |       |    |
| 22 | RVA/Human-wt/ZMB/IFS-NGS-MRC-DPRU9559/2015/G2P4   | 99.8  | 99.8  | 99.7  | 99.8  | 99.7  | 99.7 | 99.8  | 99.8  | 99.8 | 99.6 | 99.9  | 99.8 | 99.8 | 99.9  | 99.9  | 99.9  | 99.9  | 99.9  | 99.5 | 99.9  | 99.8 |      |      |       |      |      |       |       |    |
| 23 | RVA/Human-wt/ZMB/IFS-NGS-MRC-DPRU13231/2016/G2P4  | 99.8  | 99.8  | 99.7  | 99.8  | 99.7  | 99.7 | 99.8  | 99.8  | 99.8 | 99.6 | 99.9  | 99.8 | 99.8 | 99.9  | 99.9  | 99.9  | 99.9  | 99.9  | 99.7 | 99.9  | 99.8 | 99.8 |      |       |      |      |       |       |    |
| 24 | RVA/Human-wt/ZMB/IFS-NGS-MRC-DPRU13352/2016/G2P4  | 99.9  | 99.9  | 99.8  | 99.9  | 99.8  | 99.8 | 99.9  | 99.9  | 99.9 | 99.7 | 100.0 | 99.9 | 99.9 | 100.0 | 100.0 | 100.0 | 100.0 | 100.0 | 99.6 | 100.0 | 99.9 | 99.9 | 99.9 |       |      |      |       |       |    |
| 25 | RVA/Human-wt/ZMB/IFS-NGS-MRC-DPRU13545/2016/G2P4  | 99.7  | 99.7  | 99.6  | 99.7  | 99.6  | 99.6 | 99.7  | 99.7  | 99.7 | 99.5 | 99.8  | 99.7 | 99.7 | 99.8  | 99.8  | 99.8  | 99.8  | 99.8  | 99.8 | 99.8  | 99.7 | 99.7 | 99.9 | 99.8  |      |      |       |       |    |
| 26 | RVA/Human-wt/ZMB/IFS-NGS-MRC-DPRU166599/2016/G2P4 | 99.8  | 99.8  | 99.7  | 99.8  | 99.7  | 99.7 | 99.8  | 99.8  | 99.8 | 99.6 | 99.9  | 99.8 | 99.8 | 99.9  | 99.9  | 99.9  | 99.9  | 99.9  | 99.5 | 99.9  | 99.8 | 99.8 | 99.8 | 99.8  | 99.9 | 99.7 |       |       |    |
| 27 | RVA/Human-wt/ZMB/IFS-NGS-MRC-DPRU16601/2016/G2P4  | 99.8  | 99.8  | 99.7  | 99.8  | 99.7  | 99.7 | 99.8  | 99.8  | 99.8 | 99.6 | 99.9  | 99.8 | 99.8 | 99.9  | 99.9  | 99.9  | 99.9  | 99.9  | 99.5 | 99.9  | 99.8 | 99.8 | 99.8 | 99.8  | 99.9 | 99.7 | 100.0 |       |    |
| 28 | RVA/Human-wt/ZMB/IFS-NGS-MRC-DPRU16639/2016/G2P4  | 99.8  | 99.8  | 99.7  | 99.8  | 99.7  | 99.7 | 99.8  | 99.8  | 99.8 | 99.6 | 99.9  | 99.8 | 99.8 | 99.9  | 99.9  | 99.9  | 99.9  | 99.9  | 99.5 | 99.9  | 99.8 | 99.8 | 99.8 | 99.8  | 99.9 | 99.7 | 100.0 | 100.0 |    |
| 29 | RVA/Human-wt/ZMB/IFS-NGS-MRC-DPRU16646/2016/G2P4  | 99.9  | 99.9  | 99.8  | 99.9  | 99.8  | 99.8 | 99.9  | 99.9  | 99.9 | 99.7 | 100.0 | 99.9 | 99.9 | 100.0 | 100.0 | 100.0 | 100.0 | 100.0 | 99.6 | 100.0 | 99.9 | 99.9 | 99.9 | 100.0 | 99.8 | 99.9 | 99.9  | 99.9  |    |

NSP4

|    |                                                  | 1     | 2     | 3     | 4     | 5    | 6     | 7    | 8    | 9     | 10   | 11    | 12    | 13    | 14    | 15   | 16    | 17    | 18    | 19    | 20   | 21   | 22   | 23   | 24   | 25    | 26   | 27    | 28   | 29 |
|----|--------------------------------------------------|-------|-------|-------|-------|------|-------|------|------|-------|------|-------|-------|-------|-------|------|-------|-------|-------|-------|------|------|------|------|------|-------|------|-------|------|----|
| 1  | RVA/Human-wt/ZMB/IFS-NGS-MRC-DPRU1724/2012/G2P4  |       |       |       |       |      |       |      |      |       |      |       |       |       |       |      |       |       |       |       |      |      |      |      |      |       |      |       |      |    |
| 2  | RVA/Human-wt/ZMB/IFS-NGS-MRC-DPRU1729/2012/G2P4  | 100.0 |       |       |       |      |       |      |      |       |      |       |       |       |       |      |       |       |       |       |      |      |      |      |      |       |      |       |      |    |
| 3  | RVA/Human-wt/ZMB/IFS-NGS-MRC-DPRU4691/2014/G2P4  | 99.8  | 99.8  |       |       |      |       |      |      |       |      |       |       |       |       |      |       |       |       |       |      |      |      |      |      |       |      |       |      |    |
| 4  | RVA/Human-wt/ZMB/IFS-NGS-MRC-DPRU4699/2014/G2P4  | 100.0 | 100.0 | 99.8  |       |      |       |      |      |       |      |       |       |       |       |      |       |       |       |       |      |      |      |      |      |       |      |       |      |    |
| 5  | RVA/Human-wt/ZMB/IFS-NGS-MRC-DPRU4705/2014/G2P4  | 99.6  | 99.6  | 99.8  | 99.6  |      |       |      |      |       |      |       |       |       |       |      |       |       |       |       |      |      |      |      |      |       |      |       |      |    |
| 6  | RVA/Human-wt/ZMB/IFS-NGS-MRC-DPRU4714/2014/G2P4  | 99.8  | 99.8  | 100.0 | 99.8  | 99.8 |       |      |      |       |      |       |       |       |       |      |       |       |       |       |      |      |      |      |      |       |      |       |      |    |
| 7  | RVA/Human-wt/ZMB/IFS-NGS-MRC-DPRU4718/2014/G2P4  | 99.8  | 99.8  | 100.0 | 99.8  | 99.8 | 100.0 |      |      |       |      |       |       |       |       |      |       |       |       |       |      |      |      |      |      |       |      |       |      |    |
| 8  | RVA/Human-wt/ZMB/IFS-NGS-MRC-DPRU4736/2014/G2P4  | 100.0 | 100.0 | 99.8  | 100.0 | 99.6 | 99.8  | 99.8 | 99.8 | 100.0 |      |       |       |       |       |      |       |       |       |       |      |      |      |      |      |       |      |       |      |    |
| 9  | RVA/Human-wt/ZMB/IFS-NGS-MRC-DPRU4770/2014/G2P4  | 99.6  | 99.6  | 99.8  | 99.6  | 99.6 | 99.8  | 99.6 | 99.6 | 99.6  | 99.6 |       |       |       |       |      |       |       |       |       |      |      |      |      |      |       |      |       |      |    |
| 10 | RVA/Human-wt/ZMB/IFS-NGS-MRC-DPRU9393/2015/G2P4  | 99.4  | 99.4  | 99.2  | 99.4  | 99.0 | 99.2  | 99.2 | 99.4 | 99.4  | 99.0 |       |       |       |       |      |       |       |       |       |      |      |      |      |      |       |      |       |      |    |
| 12 | RVA/Human-wt/ZMB/IFS-NGS-MRC-DPRU9475/2015/G2P4  | 99.2  | 99.2  | 99.0  | 99.2  | 98.9 | 99.0  | 99.0 | 99.2 | 99.2  | 98.9 | 99.8  |       |       |       |      |       |       |       |       |      |      |      |      |      |       |      |       |      |    |
| 13 | RVA/Human-wt/ZMB/IFS-NGS-MRC-DPRU9495/2015/G2P4  | 99.4  | 99.4  | 99.2  | 99.4  | 99.0 | 99.2  | 99.2 | 99.4 | 99.4  | 99.0 | 100.0 | 99.8  |       |       |      |       |       |       |       |      |      |      |      |      |       |      |       |      |    |
| 14 | RVA/Human-wt/ZMB/IFS-NGS-MRC-DPRU9420/2015/G2P4  | 99.4  | 99.4  | 99.2  | 99.4  | 99.0 | 99.2  | 99.2 | 99.4 | 99.4  | 99.0 | 100.0 | 99.8  | 100.0 |       |      |       |       |       |       |      |      |      |      |      |       |      |       |      |    |
| 15 | RVA/Human-wt/ZMB/IFS-NGS-MRC-DPRU9438/2015/G2P4  | 99.2  | 99.2  | 99.0  | 99.2  | 98.9 | 99.0  | 99.0 | 99.2 | 99.2  | 98.9 | 99.8  | 100.0 | 99.8  | 99.8  |      |       |       |       |       |      |      |      |      |      |       |      |       |      |    |
| 16 | RVA/Human-wt/ZMB/IFS-NGS-MRC-DPRU9464/2015/G2P4  | 99.4  | 99.4  | 99.2  | 99.4  | 99.0 | 99.2  | 99.2 | 99.4 | 99.4  | 99.0 | 100.0 | 99.8  | 100.0 | 100.0 | 99.8 |       |       |       |       |      |      |      |      |      |       |      |       |      |    |
| 17 | RVA/Human-wt/ZMB/IFS-NGS-MRC-DPRU9502/2015/G2P4  | 99.4  | 99.4  | 99.2  | 99.4  | 99.0 | 99.2  | 99.2 | 99.4 | 99.4  | 99.0 | 100.0 | 99.8  | 100.0 | 100.0 | 99.8 | 100.0 | 100.0 |       |       |      |      |      |      |      |       |      |       |      |    |
| 18 | RVA/Human-wt/ZMB/IFS-NGS-MRC-DPRU9503/2015/G2P4  | 99.4  | 99.4  | 99.2  | 99.4  | 99.0 | 99.2  | 99.2 | 99.4 | 99.4  | 99.0 | 100.0 | 99.8  | 100.0 | 100.0 | 99.8 | 100.0 | 100.0 | 100.0 | 100.0 |      |      |      |      |      |       |      |       |      |    |
| 19 | RVA/Human-wt/ZMB/IFS-NGS-MRC-DPRU9515/2015/G2P4  | 99.4  | 99.4  | 99.2  | 99.4  | 99.0 | 99.2  | 99.2 | 99.4 | 99.4  | 99.0 | 100.0 | 99.8  | 100.0 | 100.0 | 99.8 | 100.0 | 100.0 | 100.0 | 100.0 | 99.8 |      |      |      |      |       |      |       |      |    |
| 20 | RVA/Human-wt/ZMB/IFS-NGS-MRC-DPRU9556/2015/G2P4  | 99.2  | 99.2  | 99.0  | 99.2  | 98.9 | 99.0  | 99.0 | 99.2 | 99.2  | 98.9 | 99.8  | 99.6  | 99.8  | 99.8  | 99.6 | 99.8  | 99.8  | 99.8  | 99.8  | 99.8 |      |      |      |      |       |      |       |      |    |
| 21 | RVA/Human-wt/ZMB/IFS-NGS-MRC-DPRU9559/2015/G2P4  | 99.0  | 99.0  | 98.9  | 99.0  | 98.7 | 98.9  | 98.9 | 99.0 | 99.0  | 98.7 | 99.6  | 99.4  | 99.6  | 99.6  | 99.4 | 99.6  | 99.6  | 99.6  | 99.6  | 99.4 | 99.6 |      |      |      |       |      |       |      |    |
| 22 | RVA/Human-wt/ZMB/IFS-NGS-MRC-DPRU13231/2016/G2P4 | 99.4  | 99.4  | 99.2  | 99.4  | 99.0 | 99.2  | 99.2 | 99.4 | 99.4  | 99.0 | 100.0 | 99.8  | 100.0 | 100.0 | 99.8 | 100.0 | 100.0 | 100.0 | 100.0 | 99.8 | 99.6 |      |      |      |       |      |       |      |    |
| 23 | RVA/Human-wt/ZMB/IFS-NGS-MRC-DPRU13301/2016/G2P4 | 99.2  | 99.2  | 99.0  | 99.2  | 98.9 | 99.0  | 99.0 | 99.2 | 99.2  | 98.9 | 99.8  | 99.6  | 99.8  | 99.8  | 99.6 | 99.8  | 99.8  | 99.8  | 99.8  | 99.6 | 99.4 | 99.8 |      |      |       |      |       |      |    |
| 24 | RVA/Human-wt/ZMB/IFS-NGS-MRC-DPRU13352/2016/G2P4 | 99.2  | 99.2  | 99.0  | 99.2  | 98.9 | 99.0  | 99.0 | 99.2 | 99.2  | 98.9 | 99.8  | 99.6  | 99.8  | 99.8  | 99.6 | 99.8  | 99.8  | 99.8  | 99.8  | 99.6 | 99.4 | 99.8 | 99.6 |      |       |      |       |      |    |
| 25 | RVA/Human-wt/ZMB/IFS-NGS-MRC-DPRU1345/2016/G2P4  | 99.2  | 99.2  | 99.0  | 99.2  | 98.9 | 99.0  | 99.0 | 99.2 | 99.2  | 98.9 | 99.8  | 99.6  | 99.8  | 99.8  | 99.6 | 99.8  | 99.8  | 99.8  | 99.8  | 99.6 | 99.4 | 99.8 | 99.6 | 99.6 |       |      |       |      |    |
| 26 | RVA/Human-wt/ZMB/IFS-NGS-MRC-DPRU1559/2016/G2P4  | 99.2  | 99.2  | 99.0  | 99.2  | 98.9 | 99.0  | 99.0 | 99.2 | 99.2  | 98.9 | 99.8  | 99.6  | 99.8  | 99.8  | 99.6 | 99.8  | 99.8  | 99.8  | 99.8  | 99.6 | 99.4 | 99.8 | 99.6 | 99.6 | 99.6  |      |       |      |    |
| 27 | RVA/Human-wt/ZMB/IFS-NGS-MRC-DPRU1660/2016/G2P4  | 99.2  | 99.2  | 99.0  | 99.2  | 98.9 | 99.0  | 99.0 | 99.2 | 99.2  | 98.9 | 99.8  | 99.6  | 99.8  | 99.8  | 99.6 | 99.8  | 99.8  | 99.8  | 99.8  | 99.6 | 99.4 | 99.8 | 99.6 | 99.6 | 99.6  | 99.6 |       |      |    |
| 28 | RVA/Human-wt/ZMB/IFS-NGS-MRC-DPRU1636/2016/G2P4  | 99.2  | 99.2  | 99.0  | 99.2  | 98.9 | 99.0  | 99.0 | 99.2 | 99.2  | 98.9 | 99.8  | 99.6  | 99.8  | 99.8  | 99.6 | 99.8  | 99.8  | 99.8  | 99.8  | 99.6 | 99.4 | 99.8 | 99.6 | 99.6 | 99.6  | 99.6 | 100.0 |      |    |
| 29 | RVA/Human-wt/ZMB/IFS-NGS-MRC-DPRU1664/2016/G2P4  | 99.2  | 99.2  | 99.0  | 99.2  | 98.9 | 99.0  | 99.0 | 99.2 | 99.2  | 98.9 | 99.8  | 99.6  | 99.8  | 99.8  | 99.6 | 99.8  | 99.8  | 99.8  | 99.8  | 99.6 | 99.4 | 99.8 | 99.6 | 99.6 | 100.0 | 99.6 | 99.6  | 99.6 |    |

## NSP5

|    |                                                  | 1     | 2    | 3     | 4    | 5     | 6    | 7    | 8    | 9     | 10   | 11    | 12    | 13    | 14   | 15    | 16    | 17    | 18    | 19    | 20    | 21    | 22    | 23    | 24    | 25    | 26    | 27    | 28   | 29   |
|----|--------------------------------------------------|-------|------|-------|------|-------|------|------|------|-------|------|-------|-------|-------|------|-------|-------|-------|-------|-------|-------|-------|-------|-------|-------|-------|-------|-------|------|------|
| 1  | RVA/Human-wt/ZMB/UFS-NGS-MRC-DPRU1724/2012/G2P4  |       |      |       |      |       |      |      |      |       |      |       |       |       |      |       |       |       |       |       |       |       |       |       |       |       |       |       |      |      |
| 2  | RVA/Human-wt/ZMB/UFS-NGS-MRC-DPRU1729/2012/G2P4  | 99.8  |      |       |      |       |      |      |      |       |      |       |       |       |      |       |       |       |       |       |       |       |       |       |       |       |       |       |      |      |
| 3  | RVA/Human-wt/ZMB/UFS-NGS-MRC-DPRU4819/2014/G2P4  | 100.0 | 99.8 |       |      |       |      |      |      |       |      |       |       |       |      |       |       |       |       |       |       |       |       |       |       |       |       |       |      |      |
| 4  | RVA/Human-wt/ZMB/UFS-NGS-MRC-DPRU4691/2014/G2P4  | 100.0 | 99.8 | 100.0 |      |       |      |      |      |       |      |       |       |       |      |       |       |       |       |       |       |       |       |       |       |       |       |       |      |      |
| 5  | RVA/Human-wt/ZMB/UFS-NGS-MRC-DPRU4699/2014/G2P4  | 99.8  | 99.7 | 99.8  | 99.8 |       |      |      |      |       |      |       |       |       |      |       |       |       |       |       |       |       |       |       |       |       |       |       |      |      |
| 6  | RVA/Human-wt/ZMB/UFS-NGS-MRC-DPRU4705/2014/G2P4  | 99.8  | 99.7 | 99.8  | 99.8 | 99.7  |      |      |      |       |      |       |       |       |      |       |       |       |       |       |       |       |       |       |       |       |       |       |      |      |
| 7  | RVA/Human-wt/ZMB/UFS-NGS-MRC-DPRU4714/2014/G2P4  | 99.8  | 99.7 | 99.8  | 99.8 | 99.7  | 99.7 |      |      |       |      |       |       |       |      |       |       |       |       |       |       |       |       |       |       |       |       |       |      |      |
| 8  | RVA/Human-wt/ZMB/UFS-NGS-MRC-DPRU4718/2014/G2P4  | 99.8  | 99.7 | 99.8  | 99.8 | 99.7  | 99.7 | 99.7 |      |       |      |       |       |       |      |       |       |       |       |       |       |       |       |       |       |       |       |       |      |      |
| 9  | RVA/Human-wt/ZMB/UFS-NGS-MRC-DPRU4736/2014/G2P4  | 99.8  | 99.7 | 99.8  | 99.8 | 100.0 | 99.7 | 99.7 | 99.7 |       |      |       |       |       |      |       |       |       |       |       |       |       |       |       |       |       |       |       |      |      |
| 10 | RVA/Human-wt/ZMB/UFS-NGS-MRC-DPRU4770/2014/G2P4  | 99.8  | 99.7 | 99.8  | 99.8 | 100.0 | 99.7 | 99.7 | 99.7 | 100.0 |      |       |       |       |      |       |       |       |       |       |       |       |       |       |       |       |       |       |      |      |
| 11 | RVA/Human-wt/ZMB/UFS-NGS-MRC-DPRU9420/2015/G2P4  | 99.7  | 99.5 | 99.7  | 99.7 | 99.5  | 99.8 | 99.5 | 99.5 | 99.5  | 99.5 | 99.5  |       |       |      |       |       |       |       |       |       |       |       |       |       |       |       |       |      |      |
| 12 | RVA/Human-wt/ZMB/UFS-NGS-MRC-DPRU9438/2015/G2P4  | 99.5  | 99.3 | 99.5  | 99.5 | 99.3  | 99.7 | 99.3 | 99.5 | 99.3  | 99.3 | 99.8  |       |       |      |       |       |       |       |       |       |       |       |       |       |       |       |       |      |      |
| 13 | RVA/Human-wt/ZMB/UFS-NGS-MRC-DPRU9464/2015/G2P4  | 99.7  | 99.5 | 99.7  | 99.7 | 99.5  | 99.8 | 99.5 | 99.5 | 99.5  | 99.5 | 100.0 | 99.8  |       |      |       |       |       |       |       |       |       |       |       |       |       |       |       |      |      |
| 14 | RVA/Human-wt/ZMB/UFS-NGS-MRC-DPRU9475/2015/G2P4  | 99.5  | 99.3 | 99.5  | 99.5 | 99.3  | 99.7 | 99.3 | 99.5 | 99.3  | 99.3 | 99.8  | 100.0 | 99.8  |      |       |       |       |       |       |       |       |       |       |       |       |       |       |      |      |
| 15 | RVA/Human-wt/ZMB/UFS-NGS-MRC-DPRU9495/2015/G2P4  | 99.7  | 99.5 | 99.7  | 99.7 | 99.5  | 99.8 | 99.5 | 99.5 | 99.5  | 99.5 | 100.0 | 99.8  | 100.0 | 99.8 |       |       |       |       |       |       |       |       |       |       |       |       |       |      |      |
| 16 | RVA/Human-wt/ZMB/UFS-NGS-MRC-DPRU9502/2015/G2P4  | 99.7  | 99.5 | 99.7  | 99.7 | 99.5  | 99.8 | 99.5 | 99.5 | 99.5  | 99.5 | 100.0 | 99.8  | 100.0 | 99.8 | 100.0 |       |       |       |       |       |       |       |       |       |       |       |       |      |      |
| 17 | RVA/Human-wt/ZMB/UFS-NGS-MRC-DPRU9503/2015/G2P4  | 99.7  | 99.5 | 99.7  | 99.7 | 99.5  | 99.8 | 99.5 | 99.5 | 99.5  | 99.5 | 100.0 | 99.8  | 100.0 | 99.8 | 100.0 | 100.0 |       |       |       |       |       |       |       |       |       |       |       |      |      |
| 18 | RVA/Human-wt/ZMB/UFS-NGS-MRC-DPRU9515/2015/G2P4  | 99.7  | 99.5 | 99.7  | 99.7 | 99.5  | 99.8 | 99.5 | 99.5 | 99.5  | 99.5 | 100.0 | 99.8  | 100.0 | 99.8 | 100.0 | 100.0 | 100.0 |       |       |       |       |       |       |       |       |       |       |      |      |
| 19 | RVA/Human-wt/ZMB/UFS-NGS-MRC-DPRU9556/2015/G2P4  | 99.5  | 99.3 | 99.5  | 99.5 | 99.3  | 99.7 | 99.3 | 99.3 | 99.3  | 99.3 | 99.8  | 99.7  | 99.8  | 99.7 | 99.8  | 99.8  | 99.8  | 99.8  |       |       |       |       |       |       |       |       |       |      |      |
| 20 | RVA/Human-wt/ZMB/UFS-NGS-MRC-DPRU9559/2015/G2P4  | 99.7  | 99.5 | 99.7  | 99.7 | 99.5  | 99.8 | 99.5 | 99.5 | 99.5  | 99.5 | 100.0 | 99.8  | 100.0 | 99.8 | 100.0 | 100.0 | 100.0 | 100.0 | 99.8  |       |       |       |       |       |       |       |       |      |      |
| 21 | RVA/Human-wt/ZMB/UFS-NGS-MRC-DPRU13231/2016/G2P4 | 99.7  | 99.5 | 99.7  | 99.7 | 99.5  | 99.8 | 99.5 | 99.5 | 99.5  | 99.5 | 100.0 | 99.8  | 100.0 | 99.8 | 100.0 | 100.0 | 100.0 | 100.0 | 100.0 | 100.0 |       |       |       |       |       |       |       |      |      |
| 22 | RVA/Human-wt/ZMB/UFS-NGS-MRC-DPRU13352/2016/G2P4 | 99.7  | 99.5 | 99.7  | 99.7 | 99.5  | 99.8 | 99.5 | 99.5 | 99.5  | 99.5 | 100.0 | 99.8  | 100.0 | 99.8 | 100.0 | 100.0 | 100.0 | 100.0 | 100.0 | 99.8  | 100.0 | 100.0 |       |       |       |       |       |      |      |
| 23 | RVA/Human-wt/ZMB/UFS-NGS-MRC-DPRU13545/2016/G2P4 | 99.7  | 99.5 | 99.7  | 99.7 | 99.5  | 99.8 | 99.5 | 99.5 | 99.5  | 99.5 | 100.0 | 99.8  | 100.0 | 99.8 | 100.0 | 100.0 | 100.0 | 100.0 | 100.0 | 99.8  | 100.0 | 100.0 | 100.0 |       |       |       |       |      |      |
| 24 | RVA/Human-wt/ZMB/UFS-NGS-MRC-DPRU16599/2016/G2P4 | 99.7  | 99.5 | 99.7  | 99.7 | 99.5  | 99.8 | 99.5 | 99.5 | 99.5  | 99.5 | 100.0 | 99.8  | 100.0 | 99.8 | 100.0 | 100.0 | 100.0 | 100.0 | 100.0 | 99.8  | 100.0 | 100.0 | 100.0 | 100.0 |       |       |       |      |      |
| 25 | RVA/Human-wt/ZMB/UFS-NGS-MRC-DPRU16601/2016/G2P4 | 99.7  | 99.5 | 99.7  | 99.7 | 99.5  | 99.8 | 99.5 | 99.5 | 99.5  | 99.5 | 100.0 | 99.8  | 100.0 | 99.8 | 100.0 | 100.0 | 100.0 | 100.0 | 100.0 | 99.8  | 100.0 | 100.0 | 100.0 | 100.0 | 100.0 |       |       |      |      |
| 26 | RVA/Human-wt/ZMB/UFS-NGS-MRC-DPRU16639/2016/G2P4 | 99.7  | 99.5 | 99.7  | 99.7 | 99.5  | 99.8 | 99.5 | 99.5 | 99.5  | 99.5 | 100.0 | 99.8  | 100.0 | 99.8 | 100.0 | 100.0 | 100.0 | 100.0 | 100.0 | 99.8  | 100.0 | 100.0 | 100.0 | 100.0 | 100.0 | 100.0 |       |      |      |
| 27 | RVA/Human-wt/ZMB/UFS-NGS-MRC-DPRU9393/2015/G2P4  | 99.7  | 99.5 | 99.7  | 99.7 | 99.5  | 99.8 | 99.5 | 99.5 | 99.5  | 99.5 | 100.0 | 99.8  | 100.0 | 99.8 | 100.0 | 100.0 | 100.0 | 100.0 | 100.0 | 99.8  | 100.0 | 100.0 | 100.0 | 100.0 | 100.0 | 100.0 | 100.0 |      |      |
| 28 | RVA/Human-wt/ZMB/UFS-NGS-MRC-DPRU13301/2016/G2P4 | 99.7  | 99.5 | 99.7  | 99.7 | 99.5  | 99.8 | 99.5 | 99.5 | 99.5  | 99.5 | 100.0 | 99.8  | 100.0 | 99.8 | 100.0 | 100.0 | 100.0 | 100.0 | 100.0 | 99.8  | 100.0 | 100.0 | 100.0 | 100.0 | 100.0 | 100.0 | 100.0 |      |      |
| 29 | RVA/Human-wt/ZMB/UFS-NGS-MRC-DPRU16646/2016/G2P4 | 99.5  | 99.3 | 99.5  | 99.5 | 99.3  | 99.7 | 99.7 | 99.3 | 99.3  | 99.3 | 99.8  | 99.7  | 99.8  | 99.7 | 99.8  | 99.8  | 99.8  | 99.8  | 99.7  | 99.8  | 99.8  | 99.8  | 99.8  | 99.8  | 99.8  | 99.8  | 99.8  | 99.8 | 99.8 |
