# Supplementary material for: Genomic Analysis of G2P[4] Group A Rotaviruses in Zambia Reveals Positive Selection in Amino Acid Site 7 of Viral Protein 3
Source: MDPI journal article supplement (doi:10.3390/v15020501), 2023-02-11
Supplement: s1 [file s1]

### Supplementary data S3: Supplementary tables S1-S17

**Table S1: Amino acid differences observed across the R2 lineages.**

| Lineages        | Representative R2 sequences                               | AA  |
|-----------------|-----------------------------------------------------------|-----|
|                 |                                                           | 159 |
| R2- Lineage I   | RVA/Human-tc/USA/DS-1/1976/G2P[4]                         | K   |
|                 | RVA/Human-wt/AUS/CK20001/1977/G2P[4]                      | K   |
| R2-Lineage II   | RVA/Human-tc/PHL/L26/1987/G12P[4]                         | K   |
|                 | RVA/Human-tc/KEN/D205/1989/G2P[4]                         | K   |
| R2-Lineage III  | RVA/Human-tc/JPN/80SR001/1980/G2P[4]                      | K   |
|                 | RVA/Human-tc/JPN/KUN/1980/G2P[4]                          | K   |
| R2-Lineage IV   | RVA/Human-tc/JPN/AU605/1986/G2P[4]                        | K   |
|                 | RVA/Human-wt/CHN/TB-Chen/1996/G2P[4]                      | K   |
| R2-Lineage V    | RVA/Human-wt/AUS/D388/2013/G3P[8]                         | R   |
|                 | RVA/Human-wt/ESP/SS98242319/2015/G3P[8]                   | R   |
|                 | <b>RVA/Human-wt/ZMB/UFS-NGS-MRC-DPRU1724/2012/G2P[4]</b>  | R   |
|                 | <b>RVA/Human-wt/ZMB/UFS-NGS-MRC-DPRU1729/2012/G2P[4]</b>  | R   |
|                 | <b>RVA/Human-wt/ZMB/UFS-NGS-MRC-DPRU4691/2014/G2P[4]</b>  | R   |
|                 | <b>RVA/Human-wt/ZMB/UFS-NGS-MRC-DPRU4699/2014/G2P[4]</b>  | R   |
|                 | <b>RVA/Human-wt/ZMB/UFS-NGS-MRC-DPRU9556/2015/G2P[4]</b>  | R   |
|                 | <b>RVA/Human-wt/ZMB/UFS-NGS-MRC-DPRU9559/2015/G2P[4]</b>  | R   |
|                 | <b>RVA/Human-wt/ZMB/UFS-NGS-MRC-DPRU16639/2016/G2P[4]</b> | R   |
|                 | <b>RVA/Human-wt/ZMB/UFS-NGS-MRC-DPRU16646/2016/G2P[4]</b> | R   |
| R2-Lineage VI   | RVA/Human-wt/BEL/B1711/2002/G6P[6]                        | K   |
|                 | RVA/Human-wt/GHA/MRC-DPRU1818/1999/G2P[6]                 | K   |
| R2-Lineage VII  | RVA/Sheep-tc/CHN/CC0812-1/2008/G10P[15]                   | K   |
|                 | RVA/Sheep-tc/CHN/LLR/1985/G10P[12]                        | K   |
| R2-Lineage VIII | RVA/Human-tc/JPN/AU109/1994/G8P[4]                        | K   |
|                 | RVA/Human-wt/HUN/BP[1]062/2004/G8P[14]                    | K   |
| R2-Lineage IX   | RVA/Human-tc/GBR/A64/1987/G10P[14]                        | K   |
|                 | RVA/Human-tc/IND/69M/1980/G8P[4]                          | K   |
| R2-Lineage X    | RVA/Human-wt/ITA/PAH136/1996/G3P[9]                       | K   |
|                 | RVA/Human-wt/HUN/Hun5/1997/G6P[14]                        | K   |
| R2-Lineage XI   | RVA/Human-wt/VNM/RVN1149/2014/G8P[8]                      | K   |
|                 | RVA/Human-wt/JPN/UR14-10/2014/G8P[8]                      | K   |
| R2-Lineage XII  | RVA/Human-wt/HUN/ERN5471/2012/G2P[4]                      | K   |
|                 | RVA/Human-wt/IND/N292/2004/G10P[11]                       | K   |
| R2-Lineage XIII | RVA/Human-wt/TUN/17237/2008/G6P[9]                        | K   |
|                 | RVA/Cow-tc/ZAF/O Agent/1965/G8P[1]                        | K   |
| R2-Lineage XIV  | RVA/Horse-wt/IRL/04V2024/2004/G14P[12]                    | K   |
|                 | RVA/Horse-wt/ZAF/EqRV-SA1/2006/G14P[12]                   | K   |

The table summarizes the different AA differences observed between lineage V R2 strains (highlighted in light-brown), where Zambian R2 sequences grouped and representative strains of defined R2 lineages. The representative study strains are highlighted in bold-black.

**Table S2:** The AA properties of observed AA substitutions across R2 lineages and region of occurrence in VP[1].

| Amino acid substitution | Region            | Amino acid property              |
|-------------------------|-------------------|----------------------------------|
| K159R                   | N-terminal domain | No change in charge or polarity; |

The table summarizes the amino acid differences observed between defined R2 lineages in respect to lineage V where the study strains clustered, their region of occurrence in VP1 and the properties of the AA residues.

**Table S3: Amino acid differences observed across the C2 lineages.**

| Lineages        | Representative C2 sequences                               | AA and position |    |     |
|-----------------|-----------------------------------------------------------|-----------------|----|-----|
|                 |                                                           | 28              | 70 | 538 |
| C2- Lineage I   | RVA/Human-tc/USA/DS-1/1976/G2P[4]                         | N               | I  | V   |
|                 | RVA/Human-wt/AUS/CK20001/1977/G2P[4]                      | N               | I  | V   |
| C2-Lineage II   | RVA/Human-tc/KEN/AK26/1982/G2P[4]                         | N               | I  | V   |
|                 | RVA/Human-tc/KEN/D205/1989/G2P[4]                         | N               | I  | V   |
| C2-Lineage III  | RVA/Human-tc/JPN/80SR001/1980/G2P[4]                      | N               | I  | V   |
|                 | RVA/Human-tc/JPN/KUN/1980/G2P[4]                          | N               | I  | V   |
| C2-Lineage IV   | RVA/Human-wt/AUS/CK20051/2010/G2P[4]                      | I               | V  | I   |
|                 | <b>RVA/Human-wt/ZMB/UFS-NGS-MRC-DPRU1724/2012/G2P[4]</b>  | I               | V  | I   |
|                 | <b>RVA/Human-wt/ZMB/UFS-NGS-MRC-DPRU1729/2012/G2P[4]</b>  | I               | V  | I   |
|                 | <b>RVA/Human-wt/ZMB/UFS-NGS-MRC-DPRU4691/2014/G2P[4]</b>  | I               | V  | I   |
|                 | <b>RVA/Human-wt/ZMB/UFS-NGS-MRC-DPRU4699/2014/G2P[4]</b>  | I               | V  | I   |
|                 | <b>RVA/Human-wt/ZMB/UFS-NGS-MRC-DPRU9556/2015/G2P[4]</b>  | I               | V  | I   |
|                 | <b>RVA/Human-wt/ZMB/UFS-NGS-MRC-DPRU9559/2015/G2P[4]</b>  | I               | V  | I   |
|                 | <b>RVA/Human-wt/ZMB/UFS-NGS-MRC-DPRU16639/2016/G2P[4]</b> | I               | V  | I   |
| C2-Lineage V    | RVA/Human-tc/USA/HCR3A/1984/G3P[3]                        | D               | I  | V   |
|                 | RVA/Human-tc/ISR/Ro1845/1985/G3P[3]                       | D               | I  | V   |
| C2-Lineage VI   | RVA/Human-wt/GHA/Ghan-149/2008/G8P[6]                     | D               | I  | V   |
|                 | RVA/Human-wt/GHA/Ghan-113/2008/G8P[6]                     | D               | I  | V   |
| C2-Lineage VII  | RVA/Cow-tc/CHN/DQ-75/2008/G10P[11]                        | D               | I  | V   |
|                 | RVA/Human-wt/HUN/BP[1]062/2004/G8P[14]                    | D               | I  | V   |
| C2-Lineage VIII | RVA/Sheep-tc/CHN/CC0812-1/2008/G10P[15]                   | D               | I  | V   |
|                 | RVA/Sheep-tc/CHN/LLR/1985/G10P[12]                        | D               | I  | V   |
| C2-Lineage IX   | RVA/Cat-wt/ITA/BA222/2005/G3P[9]                          | D               | I  | V   |
|                 | RVA/Human-wt/HUN/Hun5/1997/G6P[14]                        | D               | I  | V   |
| C2-Lineage X    | RVA/Horse-tc/JPN/Dai-10/2008/G24P[3]                      | D               | I  | V   |
|                 | RVA/Human-tc/ISR/Ro8059/1995/G6P[1]                       | D               | I  | V   |
| C2-Lineage XI   | RVA/Human-tc/IND/69M/1980/G8P[4]10                        | D               | I  | V   |
|                 | RVA/Human-wt/JPN/KF17/2010/G6P[9]                         | D               | I  | V   |
| C2-Lineage XII  | RVA/Human-tc/USA/Se584/1998/G6P[9]                        | D               | I  | V   |
|                 | RVA/Human-wt/TUN/17237/2008/G6P[9]                        | D               | I  | V   |
| C2-Lineage XIII | RVA/Horse-tc/UK/H2/1976/G3P[12]                           | D               | I  | V   |
|                 | RVA/Horse-tc/USA/FI-14/1981/G3P[12]                       | D               | I  | V   |
| C2-Lineage XIV  | RVA/cow/ZAF/MRC-DPRU1604/2007/G6P[1]                      | D               | I  | V   |
|                 | RVA/Human-tc/ITA/PA169/1988/G6P[14]                       | D               | I  | V   |

The table summarizes the different AA differences observed between lineage IV C2 strains (highlighted in light-brown), where Zambian C2 sequences grouped and representative strains of defined C2 lineages. The representative study strains are highlighted in bold-black.

**Table S4:** The AA properties of observed AA substitutions across C2 lineages and region of occurrence in VP2.

| Amino acid substitution | Region     | Amino acid property               |
|-------------------------|------------|-----------------------------------|
| N/D28I                  | N-terminal | Polar neutral to nonpolar neutral |
| I70V                    | N-terminal | No change in charge or polarity   |
| V538I                   | N-terminal | No change in charge or polarity   |

The table summarizes the amino acid differences observed between defined C2 lineages in respect to lineage IV where the study strains clustered, their region of occurrence in VP2 and the properties of the AA residues.

**Table S5: Amino acid differences observed across M2 lineages.**

| Lineages        | Representative M2 sequences                               | AA and position |     |     |
|-----------------|-----------------------------------------------------------|-----------------|-----|-----|
|                 |                                                           | 49              | 209 | 348 |
| M2- Lineage I   | RVA/Human-tc/USA/DS-1/1976/G2P[4]                         | S               | V   | M   |
| M2-Lineage II   | RVA/Human-tc/KEN/AK26/1982/G2P[4]                         | S               | V   | M   |
|                 | RVA/Human-tc/KEN/D205/1989/G2P[4]                         | S               | V   | M   |
| M2-Lineage III  | RVA/Human-tc/JPN/80SR001/1980/G2P[4]                      | S               | V   | M   |
|                 | RVA/Human-tc/JPN/KUN/1980/G2P[4]                          | S               | V   | M   |
| M2-Lineage IV   | RVA/Human-tc/CHN/TB-Chen/1996/G2P[4]                      | S               | V   | M   |
| M2-Lineage V    | RVA/Human-wt/MWI/BID11S/2012/G2P[4]                       | N               | V   | V   |
|                 | RVA/Human-wt/BEL/BE83/2010/G2P[4]                         | N               | V   | V   |
|                 | <b>RVA/Human-wt/ZMB/UFS-NGS-MRC-DPRU1724/2012/G2P[4]</b>  | N               | I   | V   |
|                 | <b>RVA/Human-wt/ZMB/UFS-NGS-MRC-DPRU1729/2012/G2P[4]</b>  | N               | I   | V   |
|                 | <b>RVA/Human-wt/ZMB/UFS-NGS-MRC-DPRU4691/2014/G2P[4]</b>  | N               | I   | V   |
|                 | <b>RVA/Human-wt/ZMB/UFS-NGS-MRC-DPRU4699/2014/G2P[4]</b>  | N               | I   | V   |
|                 | <b>RVA/Human-wt/ZMB/UFS-NGS-MRC-DPRU9556/2015/G2P[4]</b>  | N               | I   | V   |
|                 | <b>RVA/Human-wt/ZMB/UFS-NGS-MRC-DPRU9559/2015/G2P[4]</b>  | N               | I   | V   |
|                 | <b>RVA/Human-wt/ZMB/UFS-NGS-MRC-DPRU16639/2016/G2P[4]</b> | N               | I   | V   |
|                 | <b>RVA/Human-wt/ZMB/UFS-NGS-MRC-DPRU16646/2016/G2P[4]</b> | N               | I   | V   |
| M2-Lineage VI   | RVA/Human-tc/SWE/1076/1983/G2P[6]                         | S               | V   | M   |
|                 | RVA/Human-wt/GHA/Ghan-059/2008/G8P[1]                     | S               | V   | M   |
| M2-Lineage VII  | RVA/Human-wt/GHA/GHPML1989/2012/G2P[4]                    | S               | V   | M   |
|                 | RVA/Goat-tc/BGD/GO34/1999/G6P[1]                          | S               | V   | T   |
| C2-Lineage VIII | RVA/Human-wt/HUN/Hun5/1997/G6P[14]                        | S               | V   | T   |
| C2-Lineage IX   | RVA/Sheep-tc/CHN/LLR/1985/G10P[1]                         | S               | V   | M   |
|                 | RVA/Sheep-tc/CHN/CC0812-1/2008/G10P[15]                   | S               | V   | M   |
| C2-Lineage X    | RVA/Human-tc/IND/69M/1980/G8P[4]                          | S               | V   | I   |
|                 | RVA/Cow-tc/USA/NCDV/1967/G6P[6]1                          | S               | V   | A   |
| C2-Lineage XI   | RVA/Human-wt/BEL/B1711/2002/G6P[6]                        | S               | V   | I   |
|                 | RVA/Human-wt/ITA/PAH136/1996/G3P[9]                       | S               | V   | I   |
| C2-Lineage XII  | RVA/Human-tc/KEN/D205/1989/G2P[4]                         | S               | V   | T   |
|                 | RVA/Human-tc/MWI/MW1-131/1997/G8P[6]                      | S               | V   | I   |
| C2-Lineage XIII | RVA/Human-wt/GHA/GH019-08/2008/G8P[6]                     | S               | V   | I   |
|                 | RVA/Human-wt/GHA/GH018-08/2008/G8P[6]                     | S               | V   | I   |
| C2-Lineage XIV  | RVA/Cow-tc/ZAF/O Agent/1965/G8P[1]                        | S               | V   | I   |
|                 | RVA/Human-XX/KEN/B12/1987/G8P[1]                          | S               | V   | I   |

The table summarizes the different AA differences observed between lineage V M2 strains (highlighted in light-brown), where Zambian M2 sequences grouped and representative strains of defined M2 lineages. The representative study strains are highlighted in bold-black.

**Table S6:** The AA properties of observed AA substitutions across M2 lineages and region of occurrence in VP3.

| Amino acid substitution | Region                                         | Amino acid property             |
|-------------------------|------------------------------------------------|---------------------------------|
| S49N                    | N-terminal domain                              | No change in charge or polarity |
| V209I                   | Guanine-N7-Methyltransferase (N7-MTase) domain | No change in charge or polarity |
| M348V                   | 2'-O-Methyltransferase (2'-O-MTase) domain     | No change in charge or polarity |

The table summarizes the amino acid differences observed between defined M2 lineages in respect to lineage V where the study strains clustered, their region of occurrence in VP3 and the properties of the AA residues.

**Table S7: Amino acid differences observed across NSP1 lineages.**

| Lineages       | Representative A2 sequences                               | Amino acid |     |     |     |
|----------------|-----------------------------------------------------------|------------|-----|-----|-----|
|                |                                                           | 273        | 319 | 333 | 429 |
| A2- Lineage I  | RVA/Human-tc/USA/DS-1/1976/G2P[4]                         | L          | H   | W   | K   |
|                | RVA/Human-wt/AUS/CK20001/1977/G2P[4]                      | L          | H   | W   | K   |
| A2-Lineage II  | RVA/Human-wt/JPN/KN041/2012/G1P[8]                        | L          | H   | W   | K   |
|                | RVA/Human-wt/DEU/GER1H-09/2009/G8P[4]                     | L          | H   | W   | K   |
| A2-Lineage III | RVA/Human-tc/JPN/80SR001/1980/G2P[4]                      | L          | H   | W   | K   |
|                | RVA/Human-tc/JPN/KUN/1980/G2P[4]                          | L          | H   | W   | K   |
| A2-Lineage IV  | RVA/Human-wt/MWI/BID11E/2012/G2P[4]                       | F          | R   | L   | R   |
|                | <b>RVA/Human-wt/ZMB/UFS-NGS-MRC-DPRU1724/2012/G2P[4]</b>  | F          | R   | L   | R   |
|                | <b>RVA/Human-wt/ZMB/UFS-NGS-MRC-DPRU1729/2012/G2P[4]</b>  | F          | R   | L   | R   |
|                | <b>RVA/Human-wt/ZMB/UFS-NGS-MRC-DPRU4691/2014/G2P[4]</b>  | F          | R   | L   | R   |
|                | <b>RVA/Human-wt/ZMB/UFS-NGS-MRC-DPRU4699/2014/G2P[4]</b>  | F          | R   | L   | R   |
|                | <b>RVA/Human-wt/ZMB/UFS-NGS-MRC-DPRU9556/2015/G2P[4]</b>  | F          | R   | L   | R   |
|                | <b>RVA/Human-wt/ZMB/UFS-NGS-MRC-DPRU9559/2015/G2P[4]</b>  | F          | R   | L   | R   |
|                | <b>RVA/Human-wt/ZMB/UFS-NGS-MRC-DPRU16639/2016/G2P[4]</b> | F          | R   | L   | R   |
|                | <b>RVA/Human-wt/ZMB/UFS-NGS-MRC-DPRU16646/2016/G2P[4]</b> | F          | R   | L   | R   |
| A2-Lineage V   | RVA/Human-tc/SWE/1076/1983/G2P[6]                         | L          | H   | W   | K   |
|                | RVA/Human-tc/PHI/L26/1987/G12P[4]                         | L          | H   | W   | K   |

The table summarizes the different AA differences observed between lineage IV M2 strains (highlighted in light-brown), where Zambian A2 sequences grouped and representative strains of defined A2 lineages. The representative study strains are highlighted in bold-black.

**Table S8:** The AA properties of observed AA substitutions across M2 lineages and region of occurrence in NSP1.

| Amino acid substitution | Region                           | AA property                     |
|-------------------------|----------------------------------|---------------------------------|
| L273F                   | Cytoskeleton-localization domain | No change in charge or polarity |
| H319R                   | IRF-binding domain               | No change in charge or polarity |
| W333L                   | IRF-binding domain               | No change in charge or polarity |
| K429R                   | IRF-binding domain               | No change in charge or polarity |

*\*Interferon Regulatory Factor (IRF)*

The table summarizes the amino acid differences observed between defined A2 lineages in respect to lineage IV where the study strains clustered, their region of occurrence in NSP1 and the properties of the AA residues.



**Table S9: Amino acid differences observed across NSP2 lineages.**

| Lineages       | Representative N2 sequences                               | AA  |
|----------------|-----------------------------------------------------------|-----|
|                |                                                           | 273 |
| A2- Lineage I  | RVA/Human-tc/USA/DS-1/1976/G2P[4]                         | L   |
|                | RVA/Human-wt/AUS/CK20001/1977/G2P[4]                      | L   |
| A2-Lineage II  | RVA/Human-wt/JPN/KN041/2012/G1P[8]                        | L   |
|                | RVA/Human-wt/DEU/GER1H-09/2009/G8P[4]                     | L   |
| A2-Lineage III | RVA/Human-tc/JPN/80SR001/1980/G2P[4]                      | L   |
|                | RVA/Human-tc/JPN/KUN/1980/G2P[4]                          | L   |
| A2-Lineage IV  | RVA/Human-wt/MWI/BID11E/2012/G2P[4]                       | F   |
|                | <b>RVA/Human-wt/ZMB/UFS-NGS-MRC-DPRU1724/2012/G2P[4]</b>  | F   |
|                | <b>RVA/Human-wt/ZMB/UFS-NGS-MRC-DPRU1729/2012/G2P[4]</b>  | F   |
|                | <b>RVA/Human-wt/ZMB/UFS-NGS-MRC-DPRU4691/2014/G2P[4]</b>  | F   |
|                | <b>RVA/Human-wt/ZMB/UFS-NGS-MRC-DPRU4699/2014/G2P[4]</b>  | F   |
|                | <b>RVA/Human-wt/ZMB/UFS-NGS-MRC-DPRU9556/2015/G2P[4]</b>  | F   |
|                | <b>RVA/Human-wt/ZMB/UFS-NGS-MRC-DPRU9559/2015/G2P[4]</b>  | F   |
|                | <b>RVA/Human-wt/ZMB/UFS-NGS-MRC-DPRU16639/2016/G2P[4]</b> | F   |
|                | <b>RVA/Human-wt/ZMB/UFS-NGS-MRC-DPRU16646/2016/G2P[4]</b> | F   |
| A2-Lineage V   | RVA/Human-tc/SWE/1076/1983/G2P[6]                         | L   |
|                | RVA/Human-tc/PHI/L26/1987/G12P[4]                         | L   |

The table summarizes the different AA differences observed between lineage IV N2 strains (highlighted in light-brown), where Zambian N2 sequences grouped and representative strains of defined N2 lineages. The representative study strains are highlighted in bold-black.

**Table S10:** The AA properties of observed AA substitutions across N2 lineages and region of occurrence in NSP2.

| Amino acid substitution | Region            | Amino acid property             |
|-------------------------|-------------------|---------------------------------|
| L23F                    | N terminal domain | No change in polarity or charge |

The table summarizes the amino acid differences observed between defined N2 lineages in respect to lineage IV where the study strains clustered, their region of occurrence in NSP2 and the properties of the AA residues.

**Table S11: Amino acid differences observed across NSP3 lineages.**

| Lineages       | Representative T2 sequences                               | AA |
|----------------|-----------------------------------------------------------|----|
|                |                                                           | 61 |
| T2- Lineage I  | RVA/Human-tc/USA/DS-1/1976/G2P[4]                         | M  |
|                | RVA/Human-wt/AUS/CK20001/1977/G2P[4]                      | M  |
| T2-Lineage II  | RVA/Human-tc/KEN/AK26/1982/G2P[4]                         | M  |
|                | RVA/Human-tc/PHI/L26/1987/G12P[4]                         | M  |
| T2-Lineage III | RVA/Human-tc/JPN/80SR001/1980/G2P[4]                      | M  |
|                | RVA/Human-tc/JPN/KUN/1980/G2P[4]                          | M  |
| T2-Lineage IV  | RVA/Human-wt/JPN/85A21410/1985/G2P[4]                     | M  |
|                | RVA/Human-tc/JPN/AU605/1986/G2P[4]                        | M  |
| T2-Lineage V   | RVA/Human-wt/MWI/BID1CT/2012/G2P[4]                       | I  |
|                | <b>RVA/Human-wt/ZMB/UFS-NGS-MRC-DPRU1724/2012/G2P[4]</b>  | I  |
|                | <b>RVA/Human-wt/ZMB/UFS-NGS-MRC-DPRU1729/2012/G2P[4]</b>  | I  |
|                | <b>RVA/Human-wt/ZMB/UFS-NGS-MRC-DPRU4691/2014/G2P[4]</b>  | I  |
|                | <b>RVA/Human-wt/ZMB/UFS-NGS-MRC-DPRU4699/2014/G2P[4]</b>  | I  |
|                | <b>RVA/Human-wt/ZMB/UFS-NGS-MRC-DPRU9556/2015/G2P[4]</b>  | I  |
|                | <b>RVA/Human-wt/ZMB/UFS-NGS-MRC-DPRU9559/2015/G2P[4]</b>  | I  |
|                | <b>RVA/Human-wt/ZMB/UFS-NGS-MRC-DPRU16639/2016/G2P[4]</b> | I  |
|                | <b>RVA/Human-wt/ZMB/UFS-NGS-MRC-DPRU16646/2016/G2P[4]</b> | I  |
| T2-Lineage VI  | RVA/Human-tc/SWE/1076/1983/G2P[6]                         | M  |
|                | RVA/Human-tc/PHI/L26/1987/G12P[4]                         | M  |
| T2-Lineage VII | RVA/Human-tc/IND/69M/1980/G8P[4]                          | M  |
|                | RVA/Human-tc/IDN/57M/1980/G4P[1]                          | M  |

The table summarizes the different AA differences observed between lineage V T2 strains (highlighted in light-brown), where Zambian T2 sequences grouped and representative strains of defined T2 lineages. The representative study strains are highlighted in bold-black.

**Table S12:** The AA properties of observed AA substitutions across T2 lineages and region of occurrence in NSP3.

| Amino acid substitution | Region            | Amino acid property             |
|-------------------------|-------------------|---------------------------------|
| M61I                    | C terminal domain | No change in polarity or charge |

The table summarizes the amino acid differences observed between defined T2 lineages in respect to lineage V where the study strains clustered, their region of occurrence in NSP3 and the properties of the AA residues.

**Table S13: Amino acid differences observed across the NSP4 lineages.**

| Lineages          | Representative E2 sequences                               | AA  |
|-------------------|-----------------------------------------------------------|-----|
|                   |                                                           | 137 |
| E2- Lineage I     | RVA/Human-tc/USA/DS-1/1976/G2P[4]                         | R   |
| E2-Lineage II     | RVA/Human-wt/ITA/PAI11/1996/G2P[4]                        | R   |
| E2-Lineage III    | RVA/Human-tc/JPN/80SR001/1980/G2P[4]                      | R   |
| E2-Lineage IV     | RVA/Human-tc/JPN/AU605/1986/G2P[4]                        | R   |
| E2-Lineage V      | RVA/Human-wt/JPN/MMC88/2005/G2P[4]                        | R   |
| E2-Lineage VI     | RVA/human-wt/JPN/OH3493/2012/G1P[8]                       | Q   |
| E2-Lineage VII    | RVA/Human-tc/EGY/AS997/2012/G9P[14]                       | R   |
| E2-Lineage VIII   | RVA/Human-tc/MWI/MAL39/2007/G12P[6]                       | R   |
| E2-Lineage IX     | RVA/Human-wt/GHA/Ghan-059/2008/G8P[1]                     | R   |
| E2-Lineage X      | RVA/Human-wt/CMR/ES293/2011/G3P[6]                        | R   |
| E2-Lineage XI     | RVA/Human-wt/AUS/D388/2013/G3P                            | R   |
| E2-Lineage XII    | RVA/Human-wt/JPN/MU14-3/2014/G8P[8]                       | Q   |
| E2-Lineage XIII   | RVA/Cow-wt/IND/RUBV189/XXXX/G3P[3]                        | Q   |
| E2-Lineage XIV    | RVA/Human-tc/KEN/D205/1989/G2P[4]                         | Q   |
| E2-Lineage XV     | RVA/Human-wt/COD/DRC88/2003/G8P[8]                        | R   |
| E2-Lineage XVI    | RVA/Human-tc/ITA/PA169/1988/G6P[14]                       | R   |
| E2-Lineage XVII   | RVA/Cat-wt/ITA/BA222/2005/G3P[9]                          | R   |
| E2-Lineage XVIII  | RVA/roe deer-wt/SLO/D110-15/2015/G8P[14]                  | R   |
| E2-Lineage XIX    | RVA/Camel-wt/SDN/MRC-DPRU447/2002/G8P[11]                 | R   |
| E2-Lineage XX     | RVA/Dog-wt/GER/88977/2013/G8P[1]                          | R   |
| E2-Lineage XXI    | RVA/Human-wt/GHA/GH019-08/2008/G8P[6]                     | R   |
| E2-Lineage XXII   | RVA/Human-wt/KEN/Keny-061/2008/G9P[6]                     | R   |
|                   | RVA/Human-wt/MWI/BID1CT/2012/G2P[4]                       | Q   |
|                   | RVA/Human-wt/KEN/KLF0630/2013/G2P[4]                      | Q   |
|                   | <b>RVA/Human-wt/ZMB/UFS-NGS-MRC-DPRU1724/2012/G2P[4]</b>  | Q   |
|                   | <b>RVA/Human-wt/ZMB/UFS-NGS-MRC-DPRU1729/2012/G2P[4]</b>  | Q   |
|                   | <b>RVA/Human-wt/ZMB/UFS-NGS-MRC-DPRU4691/2014/G2P[4]</b>  | Q   |
|                   | <b>RVA/Human-wt/ZMB/UFS-NGS-MRC-DPRU4699/2014/G2P[4]</b>  | Q   |
|                   | <b>RVA/Human-wt/ZMB/UFS-NGS-MRC-DPRU9556/2015/G2P[4]</b>  | Q   |
|                   | <b>RVA/Human-wt/ZMB/UFS-NGS-MRC-DPRU9559/2015/G2P[4]</b>  | Q   |
|                   | <b>RVA/Human-wt/ZMB/UFS-NGS-MRC-DPRU16639/2016/G2P[4]</b> | Q   |
|                   | <b>RVA/Human-wt/ZMB/UFS-NGS-MRC-DPRU16646/2016/G2P[4]</b> | Q   |
| E2-Lineage XXIV   | RVA/Cow-wt/DEN/DK11331/2007/GXP[X]                        | R   |
| E2-Lineage XXV    | RVA/Lamb-wt/CHN/LLR/1985/G10P[12]                         | R   |
| E2-Lineage XXVI   | RVA/Human-XX/USA/CC425/XXXX/G3P[9]                        | R   |
| E2-Lineage XXVII  | RVA/Horse-wt/TUR/Eskisehir/2011/G3P[12]                   | Q   |
| E2-Lineage XXVIII | RVA/Horse-wt/JPN/J/1998/G3P[12]                           | R   |
| E2-Lineage XXIX   | RVA/Cow-wt/CHN/DQ-75/2008/G10P[11]                        | R   |
| E2-Lineage XXXI   | RVA/Human-tc/MWI/OP2-384/2001/G8P[6]                      | Q   |

The table summarizes the different AA differences observed between lineage XXII T2 strains (highlighted in light-brown), where Zambian E2 sequences grouped and representative strains of defined E2 lineages. The representative study strains are highlighted in bold-black.

**Table S14:** The AA properties of observed AA substitutions across E2 lineages and region of occurrence in NSP4.

| Amino acid substitution | Region                    | Amino acid property             |
|-------------------------|---------------------------|---------------------------------|
| R137Q                   | Signal transducing domain | Polar positive to polar neutral |

The table summarizes the amino acid differences observed between defined E2 lineages in respect to lineage XXII where the study strains clustered, their region of occurrence in NSP4 and the properties of the AA residues.

**Table S15: Amino acid differences observed across NSP5 lineages.**

| Lineages       | Representative H2 sequences                               | AA  |
|----------------|-----------------------------------------------------------|-----|
|                |                                                           | 122 |
| H2- Lineage I  | RVA/Human-tc/USA/DS-1/1976/G2P[4]                         | V   |
|                | RVA/Human-wt/AUS/CK20001/1977/G2P[4]                      | V   |
| H2-Lineage II  | RVA/Human-wt/BRA/HSP034/1998/G2P[6]                       | V   |
|                | RVA/Human-wt/ITA/PAI11/1996/G2P[4]                        | V   |
| H2-Lineage III | RVA/Human-tc/JPN/KUN/1980/G2P[4]                          | V   |
|                | RVA/Human-tc/JPN/80SR001/1980/G2P[4]                      | V   |
| H2-Lineage IV  | RVA/Human-wt/KEN/4054/2017/G2P[4]                         | M   |
|                | RVA/Human-wt/AUS/CK20051/2010/G2P[4]                      | M   |
|                | RVA/Human-wt/BRA/IP-47 MG/2008/G2P[4]                     | M   |
|                | RVA/Human-wt/BGN/J300/2010/G2P[4]                         | M   |
|                | RVA/Human-wt/USA/VU10-11-19/2011/G2P[4]                   | M   |
|                | RVA/Human-wt/AUS/WAPC703/2010/G2P[4]                      | M   |
|                | <b>RVA/Human-wt/ZMB/UFS-NGS-MRC-DPRU1724/2012/G2P[4]</b>  | M   |
|                | <b>RVA/Human-wt/ZMB/UFS-NGS-MRC-DPRU1729/2012/G2P[4]</b>  | M   |
|                | <b>RVA/Human-wt/ZMB/UFS-NGS-MRC-DPRU4691/2014/G2P[4]</b>  | M   |
|                | <b>RVA/Human-wt/ZMB/UFS-NGS-MRC-DPRU4699/2014/G2P[4]</b>  | M   |
|                | <b>RVA/Human-wt/ZMB/UFS-NGS-MRC-DPRU9556/2015/G2P[4]</b>  | M   |
|                | <b>RVA/Human-wt/ZMB/UFS-NGS-MRC-DPRU9559/2015/G2P[4]</b>  | M   |
|                | <b>RVA/Human-wt/ZMB/UFS-NGS-MRC-DPRU16639/2016/G2P[4]</b> | M   |
|                | <b>RVA/Human-wt/ZMB/UFS-NGS-MRC-DPRU16646/2016/G2P[4]</b> | M   |

The table summarizes the different AA differences observed between lineage IV H2 strains (highlighted in light-brown), where Zambian H2 sequences grouped and representative strains of defined H2 lineages. The representative study strains are highlighted in bold-black.

**Table S16:** The AA properties of observed AA substitutions across E2 lineages and region of occurrence in NSP5.

| AA difference | Region            | AA property                     |
|---------------|-------------------|---------------------------------|
| V122M         | N terminal domain | No change in charge or polarity |

The table summarizes the amino acid differences observed between defined H2 lineages in respect to lineage IV where the study strains clustered, their region of occurrence in NSP5 and the properties of the AA residues.



Table S17: Positively selected amino acid sites in 29 Zambian G2P[4] rotavirus sequences as identified by FEL, FUBAR, and MEME analysis.

| Genome segment | Positively selected sites as analysed by FEL, FUBAR and MEME |       |          |
|----------------|--------------------------------------------------------------|-------|----------|
|                | FEL                                                          | FUBAR | MEME     |
| VP1            | -                                                            | -     | 703, 969 |
| VP2            | -                                                            | -     | -        |
| VP3            | 7*                                                           | 7*    | 7*       |
| VP4            | -                                                            | -     | -        |
| VP6            |                                                              |       |          |
| VP7            | -                                                            | -     | -        |
| NSP1           | -                                                            | 480   | -        |
| NSP2           | -                                                            | -     | -        |
| NSP3           | -                                                            | -     | -        |
| NSP4           | -                                                            | -     | -        |
| NSP5           | -                                                            | -     | -        |

Positively selected amino acid sites are indicated by asterisk sign. The dash (-) sign indicates no positively site was identified.

**Table S18: The two different AA residues identified at VP3 site 7 of Zambian G2P[4] sequences.**

| <b>Zambian G2P[4] VP3 sequences</b>                 | <b>AA site 7</b> |
|-----------------------------------------------------|------------------|
| RV A/Human-wt/ZMB/UFS-NGS-MRC-DPRU1724/2012/G2P[4]  | I                |
| RV A/Human-wt/ZMB/UFS-NGS-MRC-DPRU1729/2012/G2P[4]  | I                |
| RV A/Human-wt/ZMB/UFS-NGS-MRC-DPRU4691/2014/G2P[4]  | I                |
| RV A/Human-wt/ZMB/UFS-NGS-MRC-DPRU4699/2014/G2P[4]  | R                |
| RV A/Human-wt/ZMB/UFS-NGS-MRC-DPRU4705/2014/G2P[4]  | R                |
| RV A/Human-wt/ZMB/UFS-NGS-MRC-DPRU4714/2014/G2P[4]  | R                |
| RV A/Human-wt/ZMB/UFS-NGS-MRC-DPRU4718/2014/G2P[4]  | R                |
| RV A/Human-wt/ZMB/UFS-NGS-MRC-DPRU4736/2014/G2P[4]  | R                |
| RV A/Human-wt/ZMB/UFS-NGS-MRC-DPRU4770/2014/G2P[4]  | R                |
| RV A/Human-wt/ZMB/UFS-NGS-MRC-DPRU4819/2014/G2P[4]  | R                |
| RV A/Human-wt/ZMB/UFS-NGS-MRC-DPRU9393/2015/G2P[4]  | R                |
| RV A/Human-wt/ZMB/UFS-NGS-MRC-DPRU9420/2015/G2P[4]  | R                |
| RV A/Human-wt/ZMB/UFS-NGS-MRC-DPRU9438/2015/G2P[4]  | R                |
| RV A/Human-wt/ZMB/UFS-NGS-MRC-DPRU9464/2015/G2P[4]  | I                |
| RV A/Human-wt/ZMB/UFS-NGS-MRC-DPRU9475/2015/G2P[4]  | I                |
| RV A/Human-wt/ZMB/UFS-NGS-MRC-DPRU9495/2015/G2P[4]  | I                |
| RV A/Human-wt/ZMB/UFS-NGS-MRC-DPRU9502/2015/G2P[4]  | R                |
| RV A/Human-wt/ZMB/UFS-NGS-MRC-DPRU9503/2015/G2P[4]  | R                |
| RV A/Human-wt/ZMB/UFS-NGS-MRC-DPRU9515/2015/G2P[4]  | I                |
| RV A/Human-wt/ZMB/UFS-NGS-MRC-DPRU9556/2015/G2P[4]  | R                |
| RV A/Human-wt/ZMB/UFS-NGS-MRC-DPRU9559/2015/G2P[4]  | I                |
| RV A/Human-wt/ZMB/UFS-NGS-MRC-DPRU13231/2016/G2P[4] | I                |
| RV A/Human-wt/ZMB/UFS-NGS-MRC-DPRU13301/2016/G2P[4] | I                |
| RV A/Human-wt/ZMB/UFS-NGS-MRC-DPRU13352/2016/G2P[4] | R                |
| RV A/Human-wt/ZMB/UFS-NGS-MRC-DPRU13545/2016/G2P[4] | R                |
| RV A/Human-wt/ZMB/UFS-NGS-MRC-DPRU16599/2016/G2P[4] | R                |
| RV A/Human-wt/ZMB/UFS-NGS-MRC-DPRU16601/2016/G2P[4] | I                |
| RV A/Human-wt/ZMB/UFS-NGS-MRC-DPRU16639/2016/G2P[4] | R                |
| RV A/Human-wt/ZMB/UFS-NGS-MRC-DPRU16646/2016/G2P[4] | R                |

The table displays the two AA residues, arginine and isoleucine that were identified in AA site 7 of Zambian VP3 sequences. Arginine was identified in 18 of the sequences while 11 featured an isoleucine residue.
