# Supplementary material for: Genomic Analysis of G2P[4] Group A Rotaviruses in Zambia Reveals Positive Selection in Amino Acid Site 7 of Viral Protein 3
Source: MDPI journal article supplement (doi:10.3390/v15020501), 2023-02-11
Supplement: s1 [file s1]

**Supplementary data S1: Accession numbers for the reference sequences used in the construction of the Maximum Likelihood phylogenetic trees.**

| VP7               | VP4         | VP6         | VP1         | VP2         | VP3         | NSP1        | NSP2        | NSP3        | NSP4        | NSP5        |
|-------------------|-------------|-------------|-------------|-------------|-------------|-------------|-------------|-------------|-------------|-------------|
| Outgroup          | Outgroup    | Outgroup    | Outgroup    | Outgroup    | Outgroup    | Outgroup    | Outgroup    | Outgroup    | Outgroup    | Outgroup    |
| GU723327          | JX406750    | JX406752    | JX406747    | JX406748    | JX406749    | JX406751    | JX406754    | JX406753    | JX406756    | JX406757    |
| Lineage I         | Lineage I   | Lineage I   | Lineage I   | Lineage I   | Lineage I   | Lineage I   | Lineage I   | Lineage I   | Lineage I   | Lineage I   |
| EF672581          | LC001901    | DQ870507    | DQ870505    | HQ650117    | HQ650118    | HQ650120    | HQ650123    | HQ650122    | HQ650125    | HQ650126    |
| AF044338          | KC443590    | HQ650121    | KC443587    |             | KC443589    | KC443582    |             | KC443584    |             | KC443586    |
|                   | HQ650119    | KC443591    |             |             |             |             |             |             |             |             |
| Lineage II        | Lineage II  | Lineage II  | Lineage II  | Lineage II  | Lineage II  | Lineage II  | Lineage II  | Lineage II  | Lineage II  | Lineage II  |
| JF304920          | KJ752665    | JF304930    | DQ146693    | JF304916    | EF583035    | AB975785    | EU708908    | JF304934    | DQ525190    | KC178755    |
|                   | KJ752461    |             | JF304915    | JF304927    | JF304928    | GQ414546    | EU708930    | EF672593    | KC178746    | JQ715677    |
|                   | KF636314    |             |             |             |             |             | EU708952    |             |             |             |
|                   | MG892018    |             |             |             |             |             |             |             |             |             |
|                   | MG926728    |             |             |             |             |             |             |             |             |             |
| Lineage III       | Lineage III | Lineage III | Lineage III | Lineage III | Lineage III | Lineage III | Lineage III | Lineage III | Lineage III | Lineage III |
| D50127            | AB733131    | AB733132    | LC438390    | AB733134    | LC438392    | AB733136    | AB733137    | AB733138    | D88829      | AB091727    |
| D50124            |             |             | AB733133    | LC438391    | AB733135    | LC438396    | LC438397    |             | LC438399    | LC438400    |
| Lineage IV        | Lineage IV  | Lineage IV  | Lineage IV  | Lineage IV  | Lineage IV  | Lineage IV  | Lineage IV  | Lineage IV  | Lineage IV  | Lineage IV  |
|                   | MG181837    | AB762771    | AB762772    | KC443785    | AB762774    | KJ751619    | AY787648    | LC002076    | AB762778    | LC065027    |
|                   | MG652350    | AY787645    | AY787653    | EF554083    | AY787654    | EF554088    |             | AB762777    | AY87650     | AB971565    |
|                   | JQ069668    |             |             | AY787652    |             | AB762775    |             |             |             | MH301253    |
|                   | KP882275    |             |             | LC065021    |             | MG181827    |             |             |             | KC443783    |
|                   | KC443159    |             |             |             |             | JX965145    |             |             |             | JX965157    |
|                   | KC443258    |             |             |             |             | MT767401    |             |             |             | KF716441    |
|                   | KP007171    |             |             |             |             | KC442887    |             |             |             | KU248393    |
|                   | KP753181    |             |             |             |             | KU248378    |             |             |             |             |
|                   |             |             |             |             |             | KJ753518    |             |             |             |             |
| Sub-lineage IVa-1 |             | Lineage V   |             |
| MH291294          |             | EF554086    | KU059766    | EU708891    | LC026108    | JX416214    | KU059773    | LC074739    | HM467979    |             |
| LC105588          |             |             | KU550262    | EU708902    | KC443786    | EF672592    | LC002074.1  | EF554090    | HQ641371    |             |
| KC443789          |             |             |             |             | JX965139    |             | KC442959    | MG181928    |             |             |
| MG181914          |             |             |             |             | KC443786    |             | KR705329    | KJ752125    |             |             |
|                   |             |             |             |             | KC443622    |             | MN223989    | KC571499    |             |             |
|                   |             |             |             |             | KF716382    |             | JX965148    | KU361002    |             |             |
|                   |             |             |             |             | KF716381    |             | KU059773    | KP882535    |             |             |
|                   |             |             |             |             | LC060819    |             | KJ753821    | KP188805    |             |             |
|                   |             |             |             |             | KR705214    |             | LC002074    | MF184795    |             |             |
|                   |             |             |             |             | LC026108    |             | KJ753486    | KJ752615    |             |             |
|                   |             |             |             |             | KR705401    |             | KM660141    |             |             |             |

|                          |                     |                     |                     |                      |                    |                     |
|--------------------------|---------------------|---------------------|---------------------|----------------------|--------------------|---------------------|
|                          |                     |                     |                     | MG181768<br>KJ752996 | KJ583192           |                     |
| <b>Sub-lineage IVa-2</b> | <b>Lineage VI</b>   | <b>Lineage VI</b>   | <b>Lineage VI</b>   | <b>Lineage VI</b>    | <b>Lineage VI</b>  | <b>Lineage VI</b>   |
| AY261354                 | KJ748480            | EF554082            | KP882630            | JX416213             | JX416216           | AB796456            |
| AY261355                 | KP882628            | KJ751624            | KP882685            | KP882477             | AB753500           | LC228324            |
| AY261353                 |                     |                     |                     |                      |                    |                     |
| <b>Sub-lineage IVa-3</b> | <b>Lineage VII</b>  | <b>Lineage VII</b>  | <b>Lineage VII</b>  | <b>Lineage VII</b>   | <b>Lineage VII</b> | <b>Lineage VII</b>  |
| MG181320                 | LC095956            | FJ031024            | FN665689            | GU937879             | EF672558           | KX265688            |
| MN066787                 | LC169856            | JQ013502            | GU384191            | LC105582             | JQ863317           | AB975935            |
| LC086796                 |                     |                     |                     |                      |                    |                     |
| MZ094197                 |                     |                     |                     |                      |                    |                     |
| KC443789                 |                     |                     |                     |                      |                    |                     |
| JX965171                 |                     |                     |                     |                      |                    |                     |
| JQ069505                 |                     |                     |                     |                      |                    |                     |
| KP752665                 |                     |                     |                     |                      |                    |                     |
| KU356590                 |                     |                     |                     |                      |                    |                     |
|                          | <b>Lineage VIII</b> | <b>Lineage VIII</b> | <b>Lineage VIII</b> | <b>Lineage VIII</b>  |                    | <b>Lineage VIII</b> |
|                          | EF583020            | LC065020            | HQ834198            | EF554106             |                    | AB938299            |
|                          |                     | FN665688            | JQ013503            |                      |                    | GU937886            |
|                          | <b>Lineage IX</b>   | <b>Lineage IX</b>   | <b>Lineage IX</b>   | <b>Lineage IX</b>    |                    | <b>Lineage IX</b>   |
|                          | KP882925            | EF583017            | GU827407            | JQ013504             |                    | LC119113            |
|                          | EF554152            | EF576937            | EF554105            | HQ834207             |                    | KP882481            |
|                          | <b>Lineage X</b>    | <b>Lineage X</b>    | <b>Lineage X</b>    | <b>Lineage X</b>     |                    | <b>Lineage X</b>    |
|                          | DQ870496            | GU296420            | AB748581            | EF583015             |                    | KM660203            |
|                          | EF554130            | EF554104            | KC815659            | DQ70495              |                    | KM660192            |
|                          | <b>Lineage XI</b>   | <b>Lineage XI</b>   | <b>Lineage XI</b>   | <b>Lineage XI</b>    |                    | <b>Lineage XI</b>   |
|                          | EF583016            | LCO7473             | EF583014            | EF554084             |                    | KUO59775            |
|                          | KC175098            | LC102997            | JF421976            | GU296424             |                    |                     |
|                          | <b>Lineage XII</b>  | <b>Lineage XII</b>  | <b>Lineage XII</b>  | <b>Lineage XII</b>   |                    | <b>Lineage XII</b>  |
|                          | AY740737            | KJ919361            | JX271002            | JF304917             |                    | LC074740            |
|                          | KP258402            | KC175269            | EF583042            | AB751564             |                    | LC102992            |
|                          | <b>Lineage XIII</b> | <b>Lineage XIII</b> | <b>Lineage XIII</b> | <b>Lineage XIII</b>  |                    | <b>Lineage XIII</b> |
|                          | AB573073            | JX271001            | KM454482            | KJ748478             |                    | EF592592            |
|                          | DQ838647            | JF693037            | KM454493            | KJ748467             |                    |                     |
|                          | <b>Lineage XIV</b>  | <b>Lineage XIV</b>  | <b>Lineage XIV</b>  |                      |                    | <b>Lineage XIV</b>  |
|                          | EF554108            | JN903527            | EF554127            |                      |                    | JF304924            |
|                          | GU827410            | JQ345489            | KF636257            |                      |                    | AB755562            |
|                          | <b>Lineage XV</b>   |                     |                     |                      |                    | <b>Lineage XV</b>   |
|                          | JQ345494            |                     |                     |                      |                    | GU25961             |
|                          | AB908927            |                     |                     |                      |                    | DQ005105            |
|                          |                     |                     |                     |                      |                    | <b>Lineage XVI</b>  |

---

|  |                |
|--|----------------|
|  | EF554135       |
|  | Lineage XVII   |
|  | GU827415       |
|  | GU296416       |
|  | Lineage XVIII  |
|  | KY426806       |
|  | JN831207       |
|  | Lineage XIX    |
|  | KC257089       |
|  | KP198645       |
|  | Lineage XX     |
|  | EF554157       |
|  | KJ940160       |
|  | Lineage XXI    |
|  | KJ870898       |
|  | KJ748485       |
|  | Lineage XXII   |
|  | EF672561       |
|  | KP941135       |
|  | Lineage XXIII  |
|  | MG181621       |
|  | MG181929       |
|  | Lineage XXIV   |
|  | JN248454       |
|  | KP752503       |
|  | LC055556       |
|  | Lineage XXV    |
|  | FJ031022       |
|  | JQ031148       |
|  | Lineage XXVI   |
|  | AJ311728       |
|  | AJ311729       |
|  | Lineage XXVII  |
|  | JQ687223       |
|  | JN903510       |
|  | Lineage XXVIII |
|  | KC815689       |
|  | Lineage XXIX   |
|  | GU181282       |
|  | Lineage XXX    |
|  | KY972050       |
|  | KY972002       |

---
